# Supplementary material
Source: PubMed Central journal article supplement (PMC2725200)
Supplement: NIHMS131182-supplement-01.pdf [file NIHMS131182-supplement-01.pdf]

Supporting information for

## **Synthesis and characterization of modified nucleotides in the 970 hairpin loop of *Escherichia coli* 16S ribosomal RNA**

N. Dinuka Abeydeera, Christine S. Chow\*

### **Contents**

- S1-2 Contents
- S3 Characterization of helix 31 analogues by MALDI-TOF mass spectrometric analysis
- S4 Confirmation of nucleosides present in the synthetic RNAs
- S5 The UV melting profiles for helix 31 RNAs
- S6 CD spectra of the ECh31WT RNA construct acquired in Na<sup>+</sup>, K<sup>+</sup>, and Mg<sup>2+</sup> containing buffers
- S7 Representative normalized UV melting curves of the ECh31WT RNA taken in Na<sup>+</sup> and K<sup>+</sup> buffers
- S8 NMR assignments for 2-*N*-methyl-6-*O*-(diphenylcarbamoyl)guanosine, **5**
- S9-11 Characterization of 2-*N*-methyl-6-*O*-(diphenylcarbamoyl)guanosine, **5**
- S12 Scheme for the synthesis of 5'-*O*-DMT-2'-*O*-TOM-6-*O*-DPC-2-*N*-methylguanosine phosphoramidite
- S13 NMR assignments for 5'-*O*-(4,4'-dimethoxytrityl)-2-*N*-methyl-6-*O*-(diphenylcarbamoyl)guanosine, **6**
- S14-16 Characterization of 5'-*O*-(4,4'-dimethoxytrityl)-2-*N*-methyl-6-*O*-(diphenylcarbamoyl)guanosine, **6**
- S17 NMR assignments for 5'-*O*-(4,4'-dimethoxytrityl)-2'-*O*-[[[(triisopropylsilyl)oxy]-methyl]-2-*N*-methyl-6-*O*-(diphenylcarbamoyl)guanosine, **7**
- S18-19 Characterization of 5'-*O*-(4,4'-dimethoxytrityl)-2'-*O*-[[[(triisopropylsilyl)oxy]-methyl]-2-*N*-methyl-6-*O*-(diphenylcarbamoyl)guanosine, **7**

S20-24 Characterization of 5'-*O*-(4,4'-dimethoxytrityl)-2'-*O*-[[triisopropylsilyloxy]-methyl]-2-*N*-methyl-6-*O*-(diphenylcarbamoyl) guanosine 3'-(2-cyanoethyl diisopropylphosphoramidite), **8**

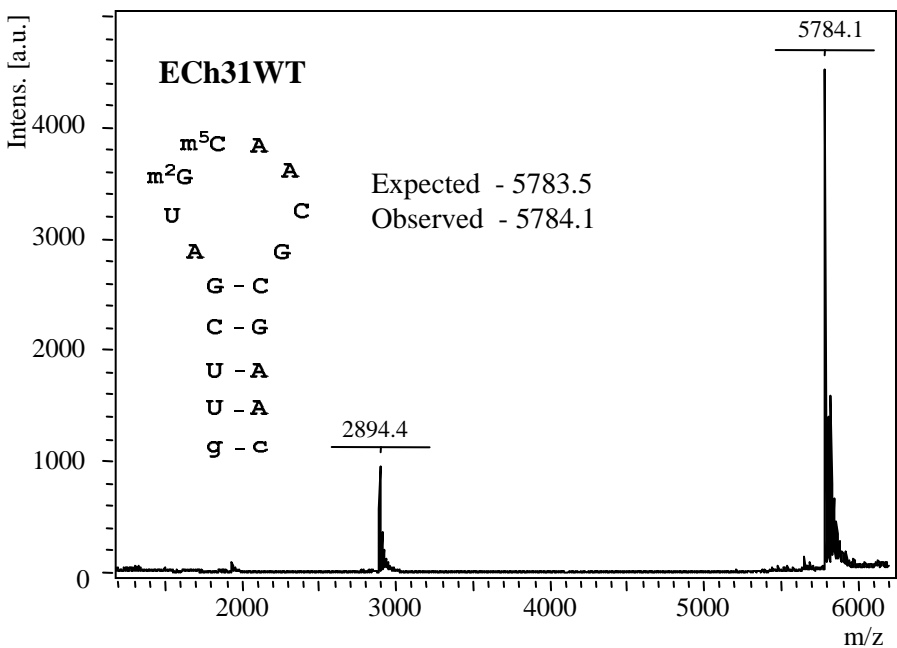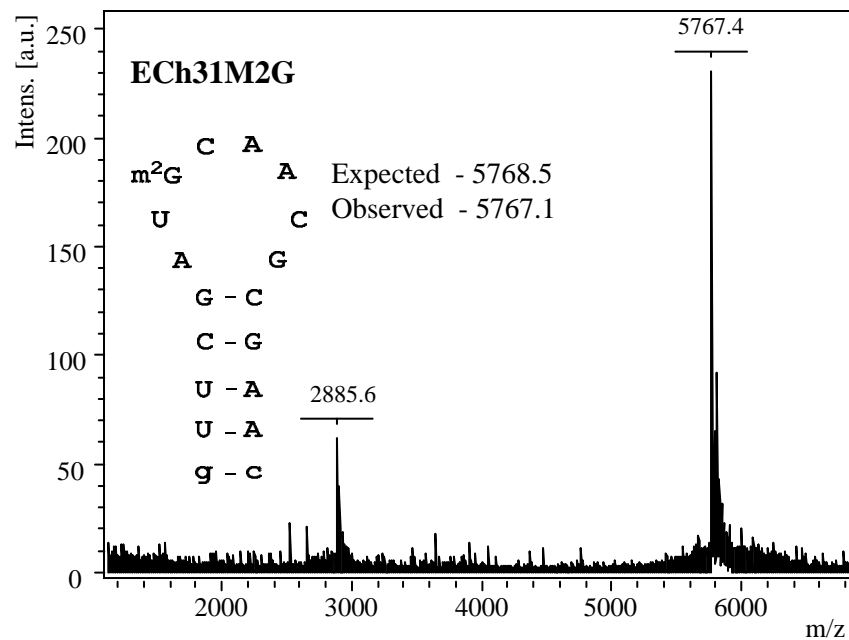

**Figure S1.** Characterization of helix 31 analogues by MALDI-TOF mass spectrometric analysis.

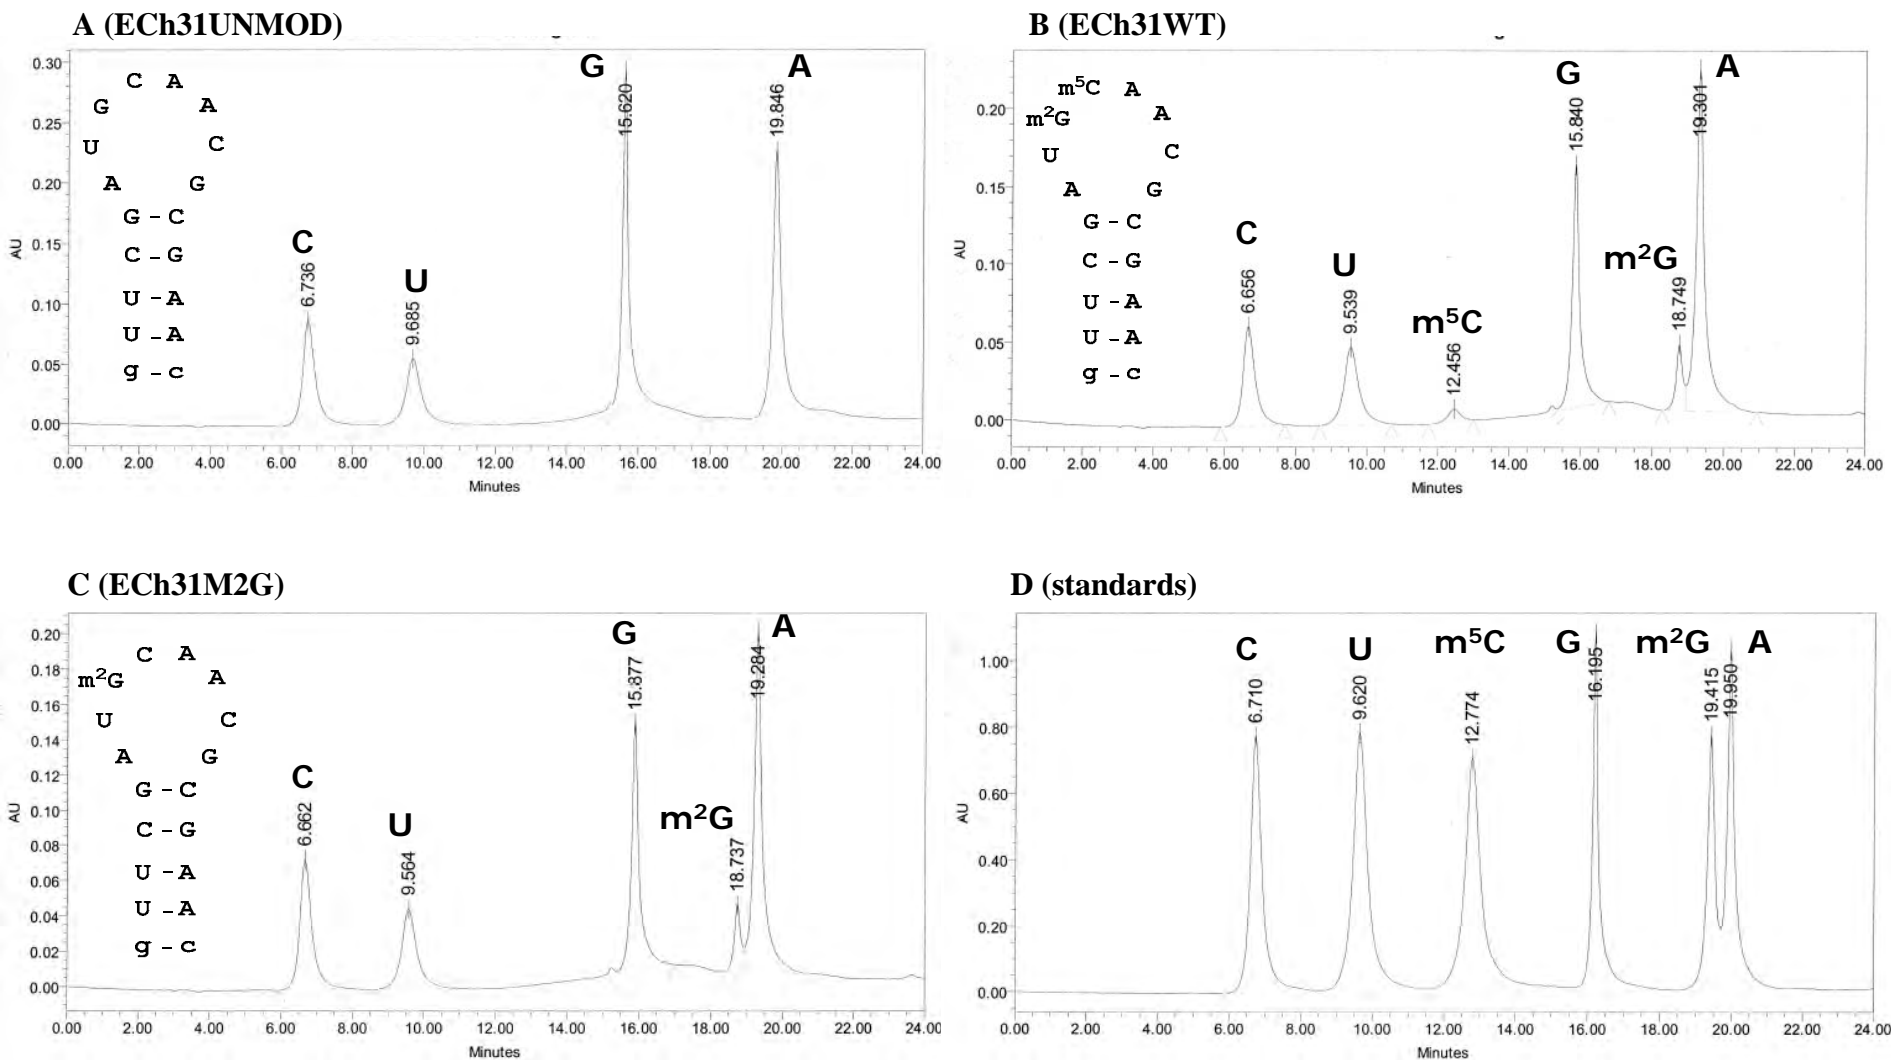

**Figure S2.** Confirmation of nucleosides present in the synthetic oligos obtained by digestion of ECh31UNMOD (A), ECh31WT (B) and ECh31M2G (C) RNAs with P1 nuclease and treatment of resulting nucleotides with calf intestinal phosphatase were analyzed by reverse-phase HPLC on a Supelco C18 column. Approximately 0.5 OD of RNA were digested and 0.25 OD were injected for each analysis. A linear gradient in 0.1 M TEAA buffer, pH 6.0 from 0 to 30% methanol over 17 min at a flow rate of 1 mL/min was employed. The retention times of the nucleosides were confirmed by injection of authentic standards (D) with a deviation of <0.5% (C = 6.71 min, U = 9.62 min, m<sup>5</sup>C = 12.77, G = 16.19 min, m<sup>2</sup>G = 19.42 min, A = 19.95 min).

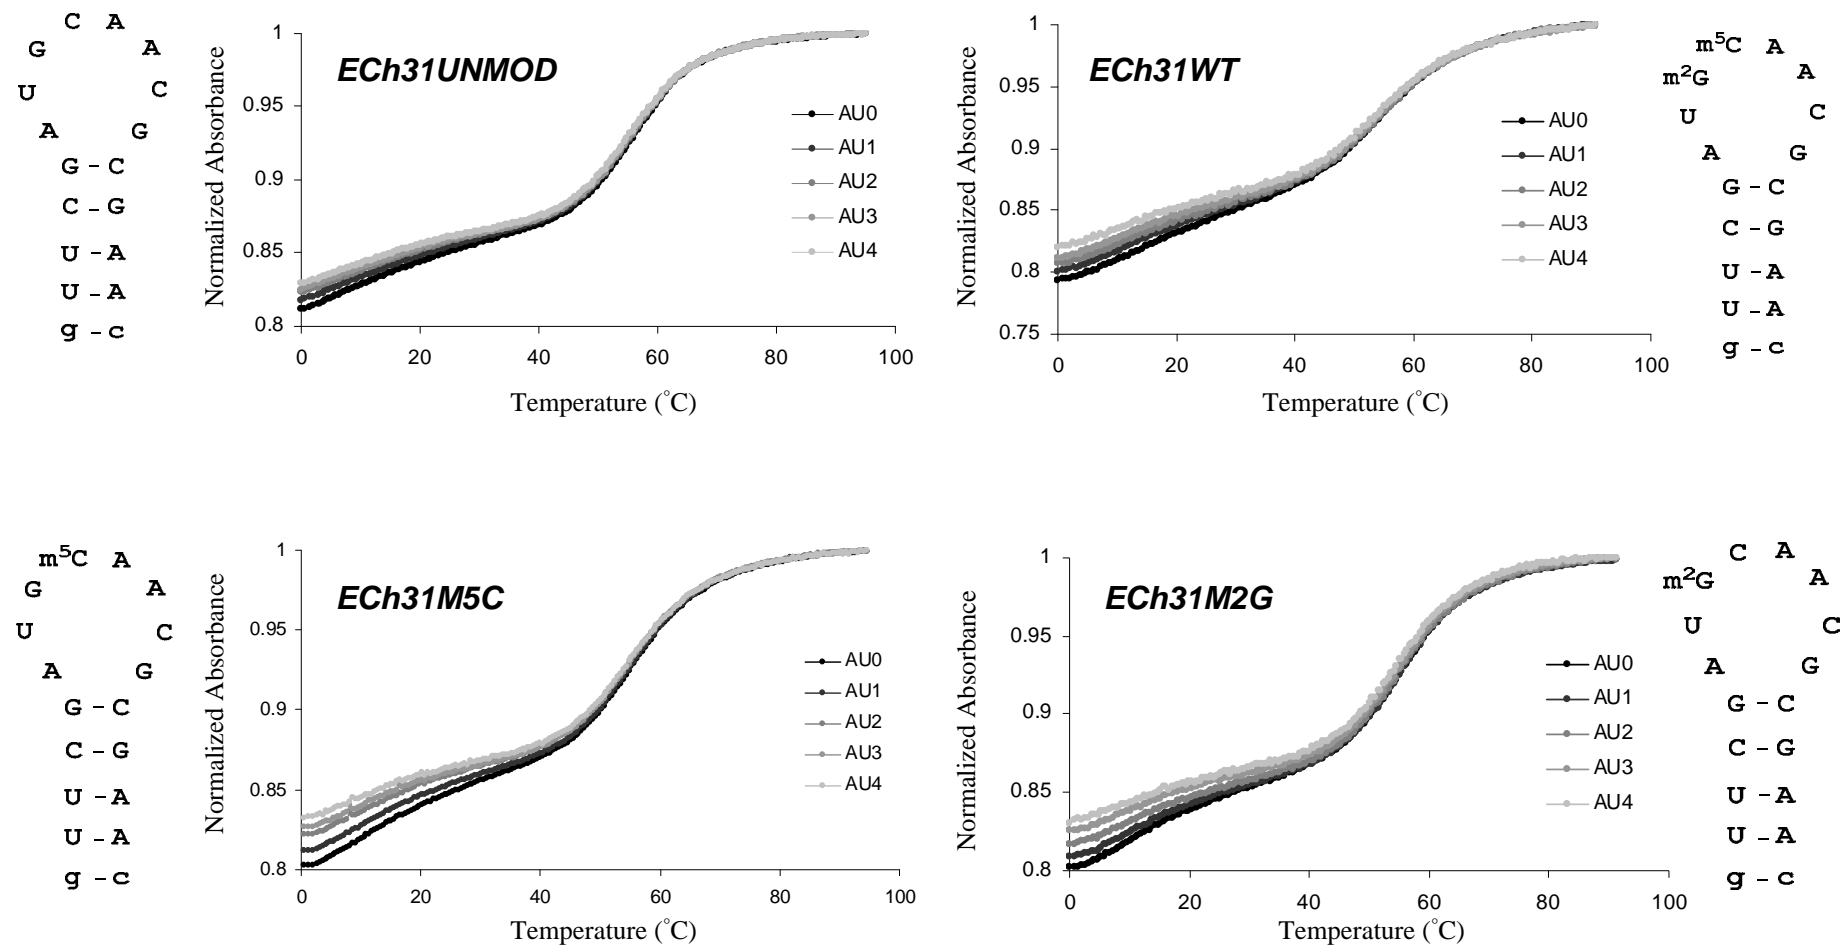

**Figure S3.** The UV melting profiles representing the melting transitions of four RNAs are shown. AU0-AU4 represent profiles corresponding to different dilutions of each RNA taken in 15 mM NaCl, 20 mM sodium cacodylate, 0.5 mM Na<sub>2</sub>EDTA at pH 7.0.

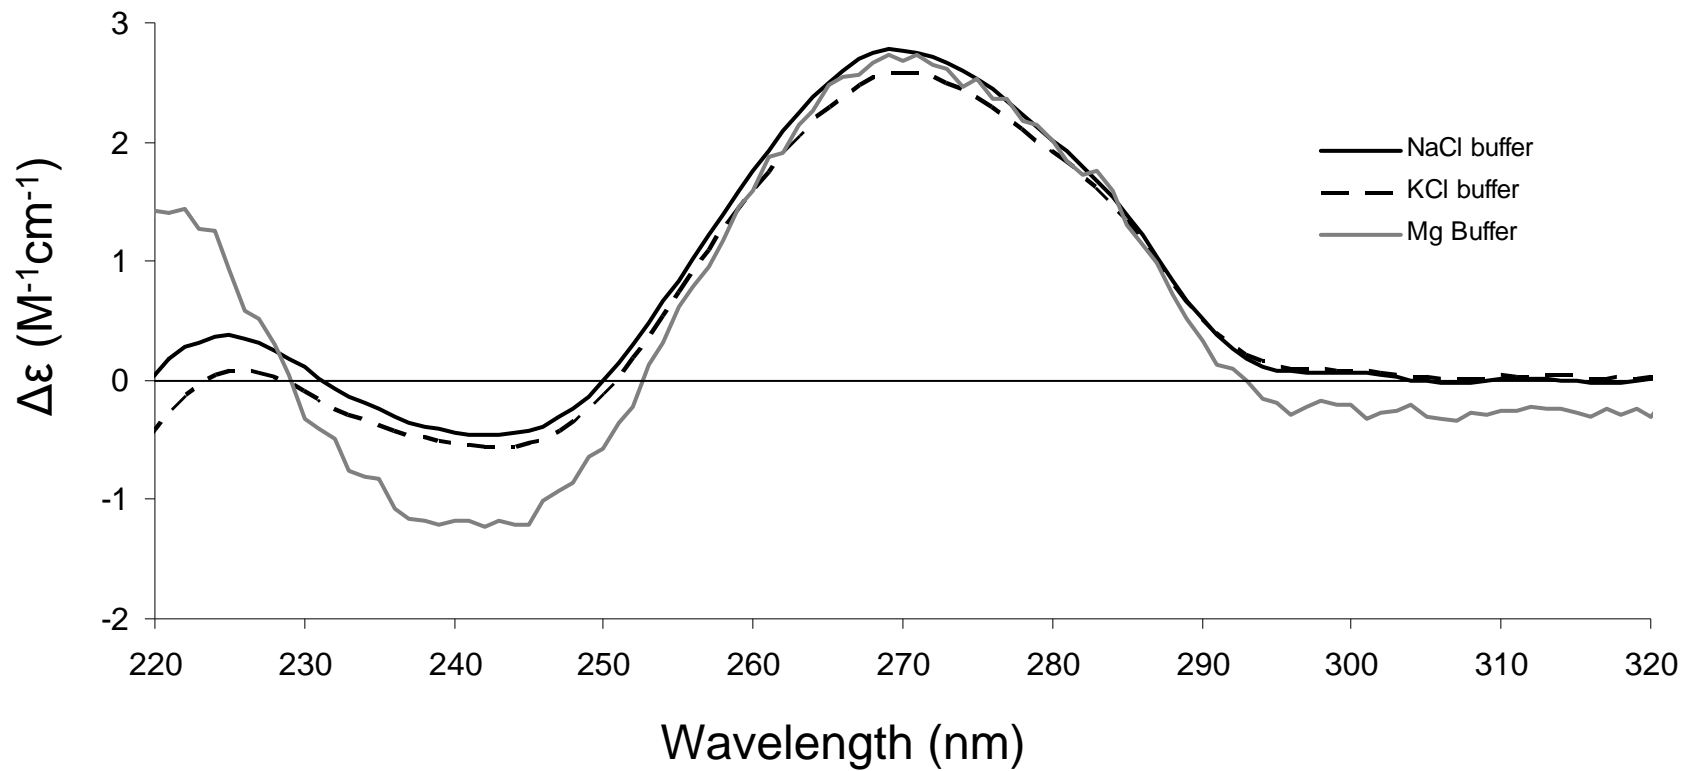

NaCl buffer = 15 mM NaCl, 20 mM sodium cacodylate, 0.5 mM Na<sub>2</sub>EDTA at pH 7.0

KCl buffer = 15 mM KCl, 20 mM cacodylic acid, 20 mM Tris [basic form], 0.5 mM Na<sub>2</sub>EDTA at pH 7.0

Mg buffer = 25 mM cacodylic acid, 25 mM Tris [basic form], 30 mM KCl, 70 mM NH<sub>4</sub>Cl, 3 mM MgCl<sub>2</sub> at pH 7.0

**Figure S4.** CD spectra of the ECh31WT RNA construct acquired in Na<sup>+</sup>, K<sup>+</sup>, and Mg<sup>2+</sup> containing buffers.

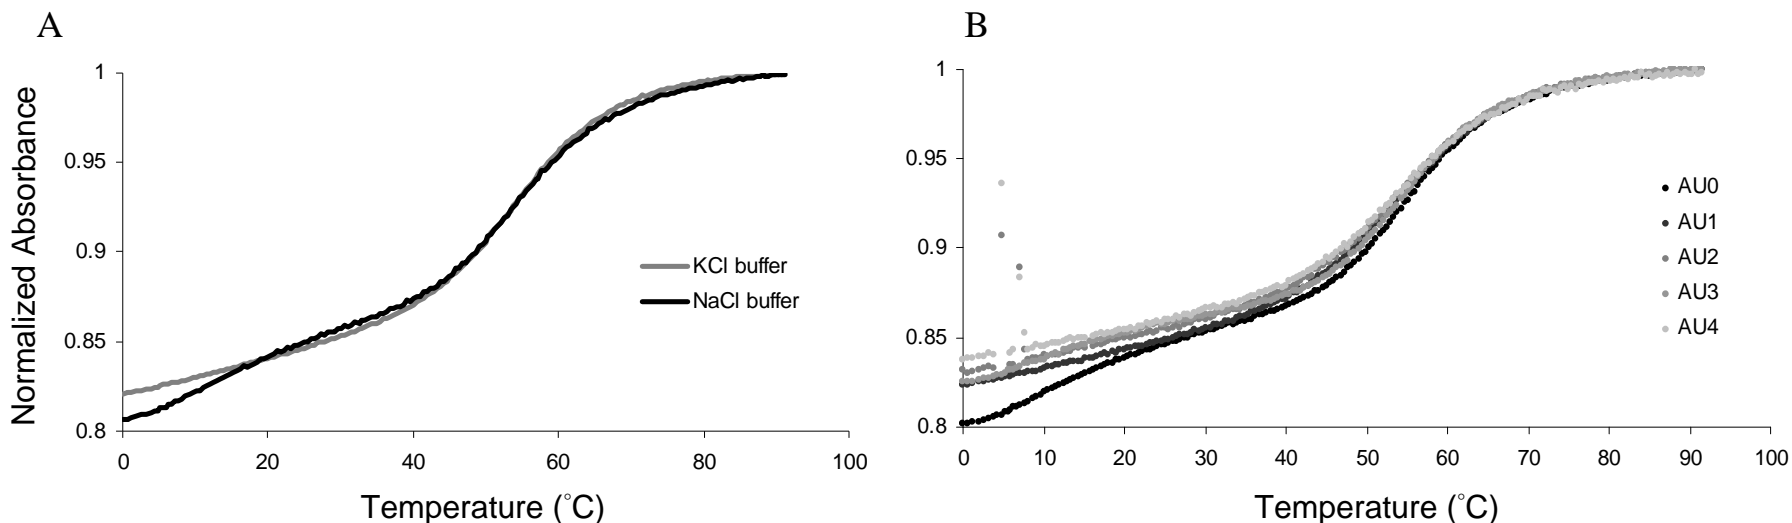

**C**

|                                    | $\Delta G_{37}^{\circ}$ (kcal/mol) | $\Delta H^{\circ}$ (kcal/mol)      | $\Delta S^{\circ}$ (cal/K.mol)      | $T_m$ (°C)  |
|------------------------------------|------------------------------------|------------------------------------|-------------------------------------|-------------|
| <b><i>ECh31WT</i> –KCl buffer</b>  | <b><math>-2.13 \pm 0.03</math></b> | <b><math>-39.37 \pm 1.2</math></b> | <b><math>-120.08 \pm 3.8</math></b> | <b>54.7</b> |
| <b><i>ECh31WT</i> –NaCl buffer</b> | <b><math>-2.10 \pm 0.07</math></b> | <b><math>-37.26 \pm 1.2</math></b> | <b><math>-113.37 \pm 3.6</math></b> | <b>55.5</b> |

**Figure S5.** Representative normalized UV melting curves of the ECh31WT RNA taken in Na<sup>+</sup> (15 mM NaCl, 20 mM sodium cacodylate, 0.5 mM Na<sub>2</sub>EDTA at pH 7.0) and K<sup>+</sup> (15 mM KCl, 20 mM cacodylic acid, 20 mM Tris [basic form], 0.5 mM Na<sub>2</sub>EDTA, pH 7.0) buffers (A), AU0-AU4 representing the profiles corresponding to different dilutions of ECh31WT RNA taken in K<sup>+</sup> buffer (B), Thermodynamics of the ECh31WT RNA in Na<sup>+</sup> and K<sup>+</sup> buffers (C).

NMR characterization for 2-*N*-Methyl-6-*O*-(diphenylcarbamoyl)guanosine [5].

<sup>1</sup>H NMR (DMSO-*d*<sup>6</sup>, 400 MHz) 2.81 (d, 3H), 3.51-3.56 (m, 1H), 3.61-3.66 (m, 1H), 3.90 (m, 1H), 4.02 (q, 1H), 4.15 (br.d, 1H), 4.62 (br.s, 1H), 4.99 (br.s, 1H), 5.21 (d, *J* = 4.8 Hz, 1H), 5.48 (d, *J* = 5.6 Hz, 1H), 5.82 (d, *J* = 5.6 Hz, 1H), 7.28-7.32 (m, 4H), 7.4-7.44 (m, 6H), 8.19 (s, 1H); <sup>13</sup>C NMR (DMSO-*d*<sup>6</sup>, 400 MHz) 28.3, 61.5, 70.5, 73.1, 85.5, 116.4, 127.1, 129.4, 140.9, 141.8, 150.4, 155.6, 155.9, 159.6



proton spectrum

Mercury 400 spectrometer

Pulse Sequence: s2pul

2-N-Methyl-6-O-(diphenylcarbamoyl)guanosine [5].

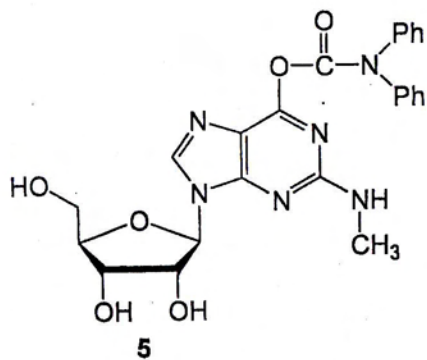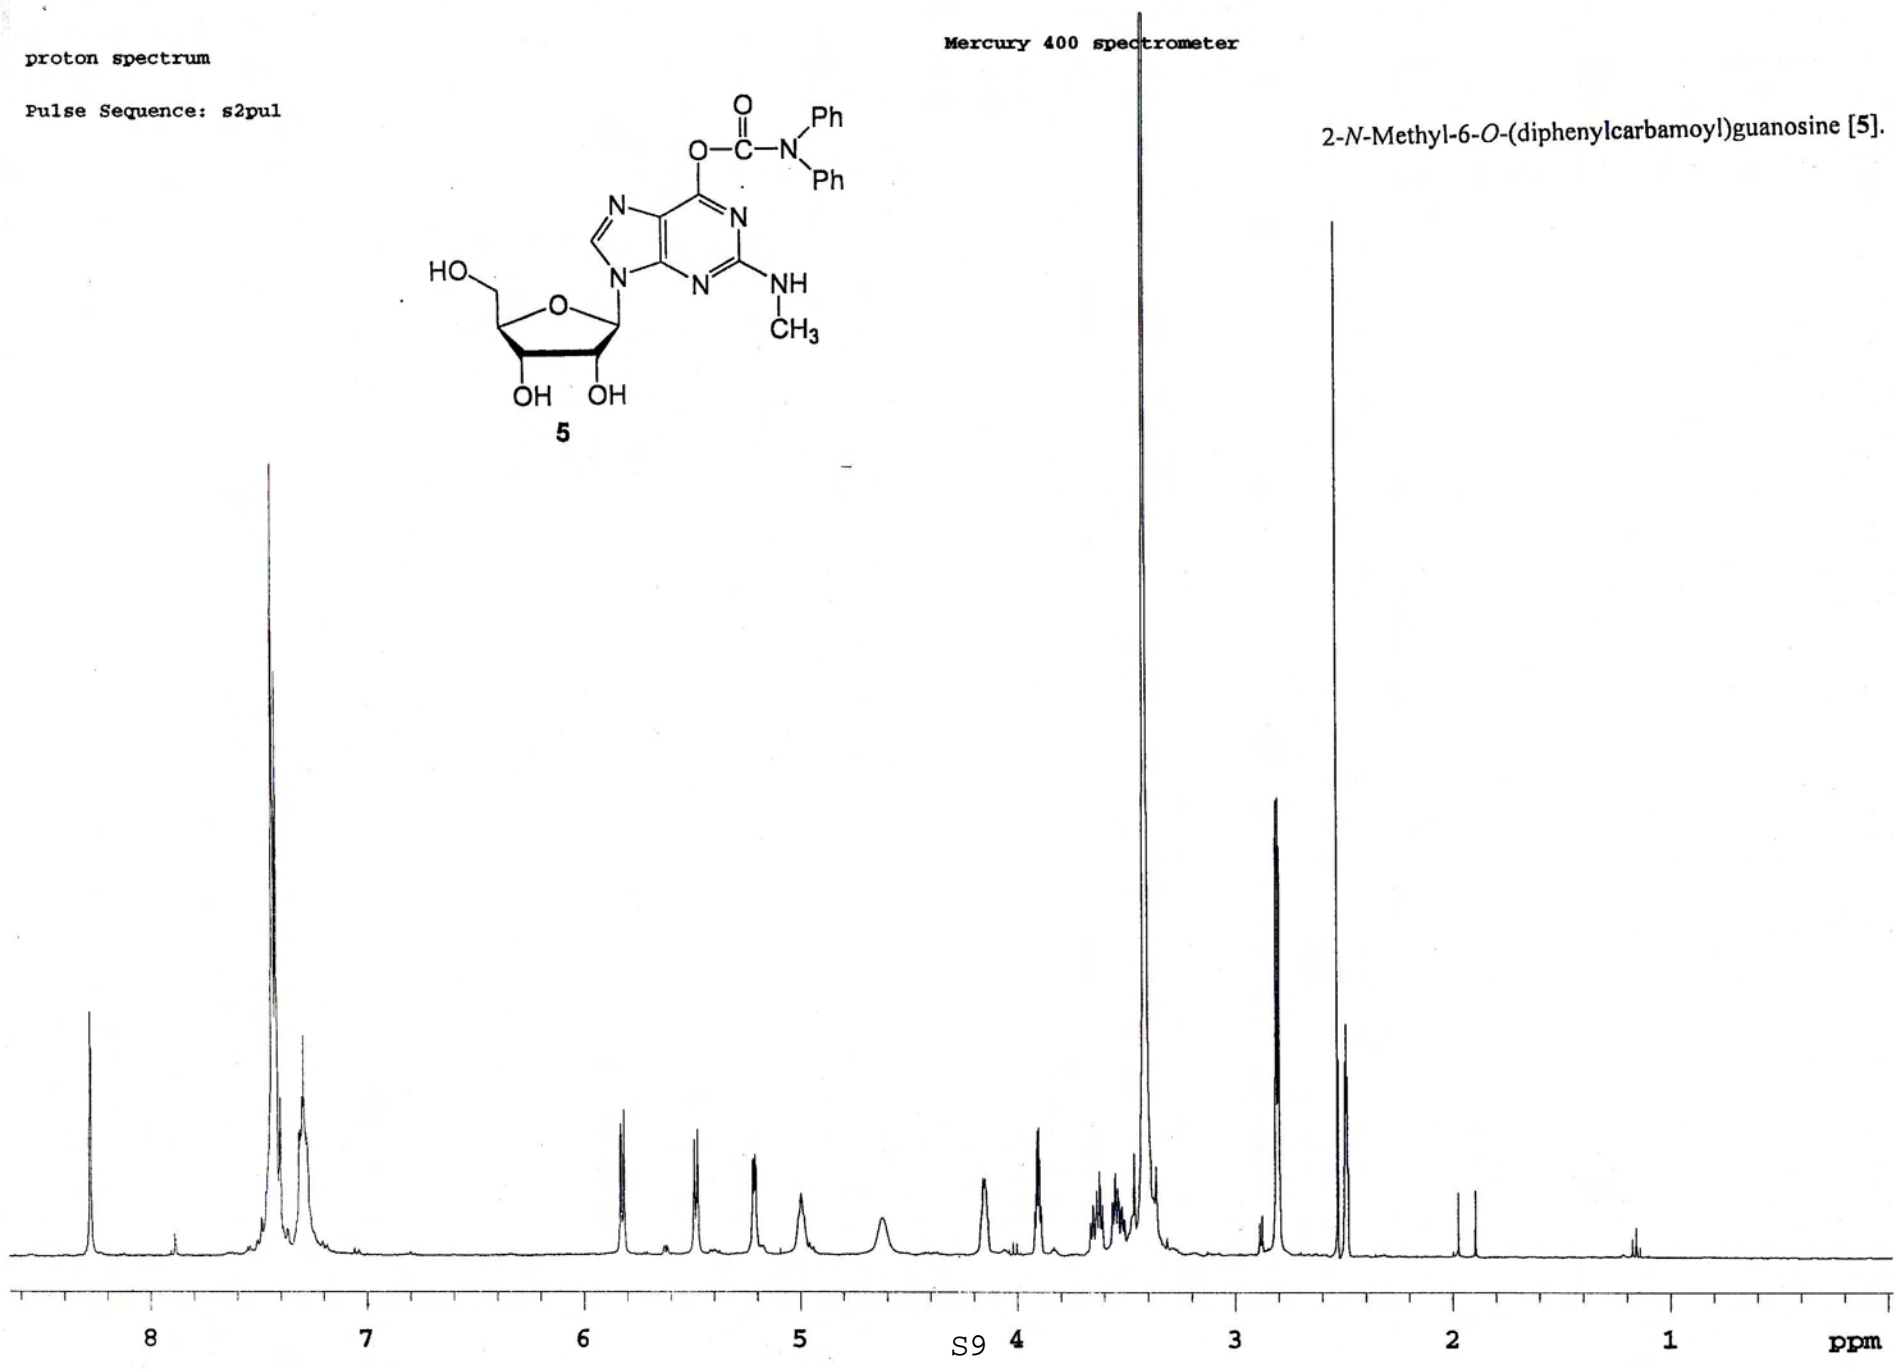

2-*N*-Methyl-6-*O*-(diphenylcarbamoyl)guanosine [5].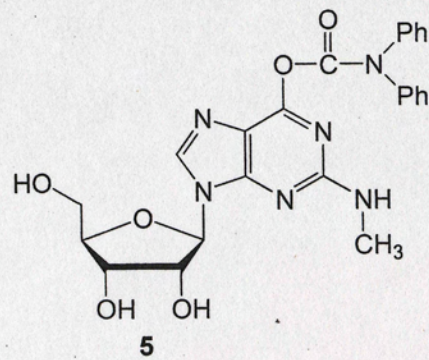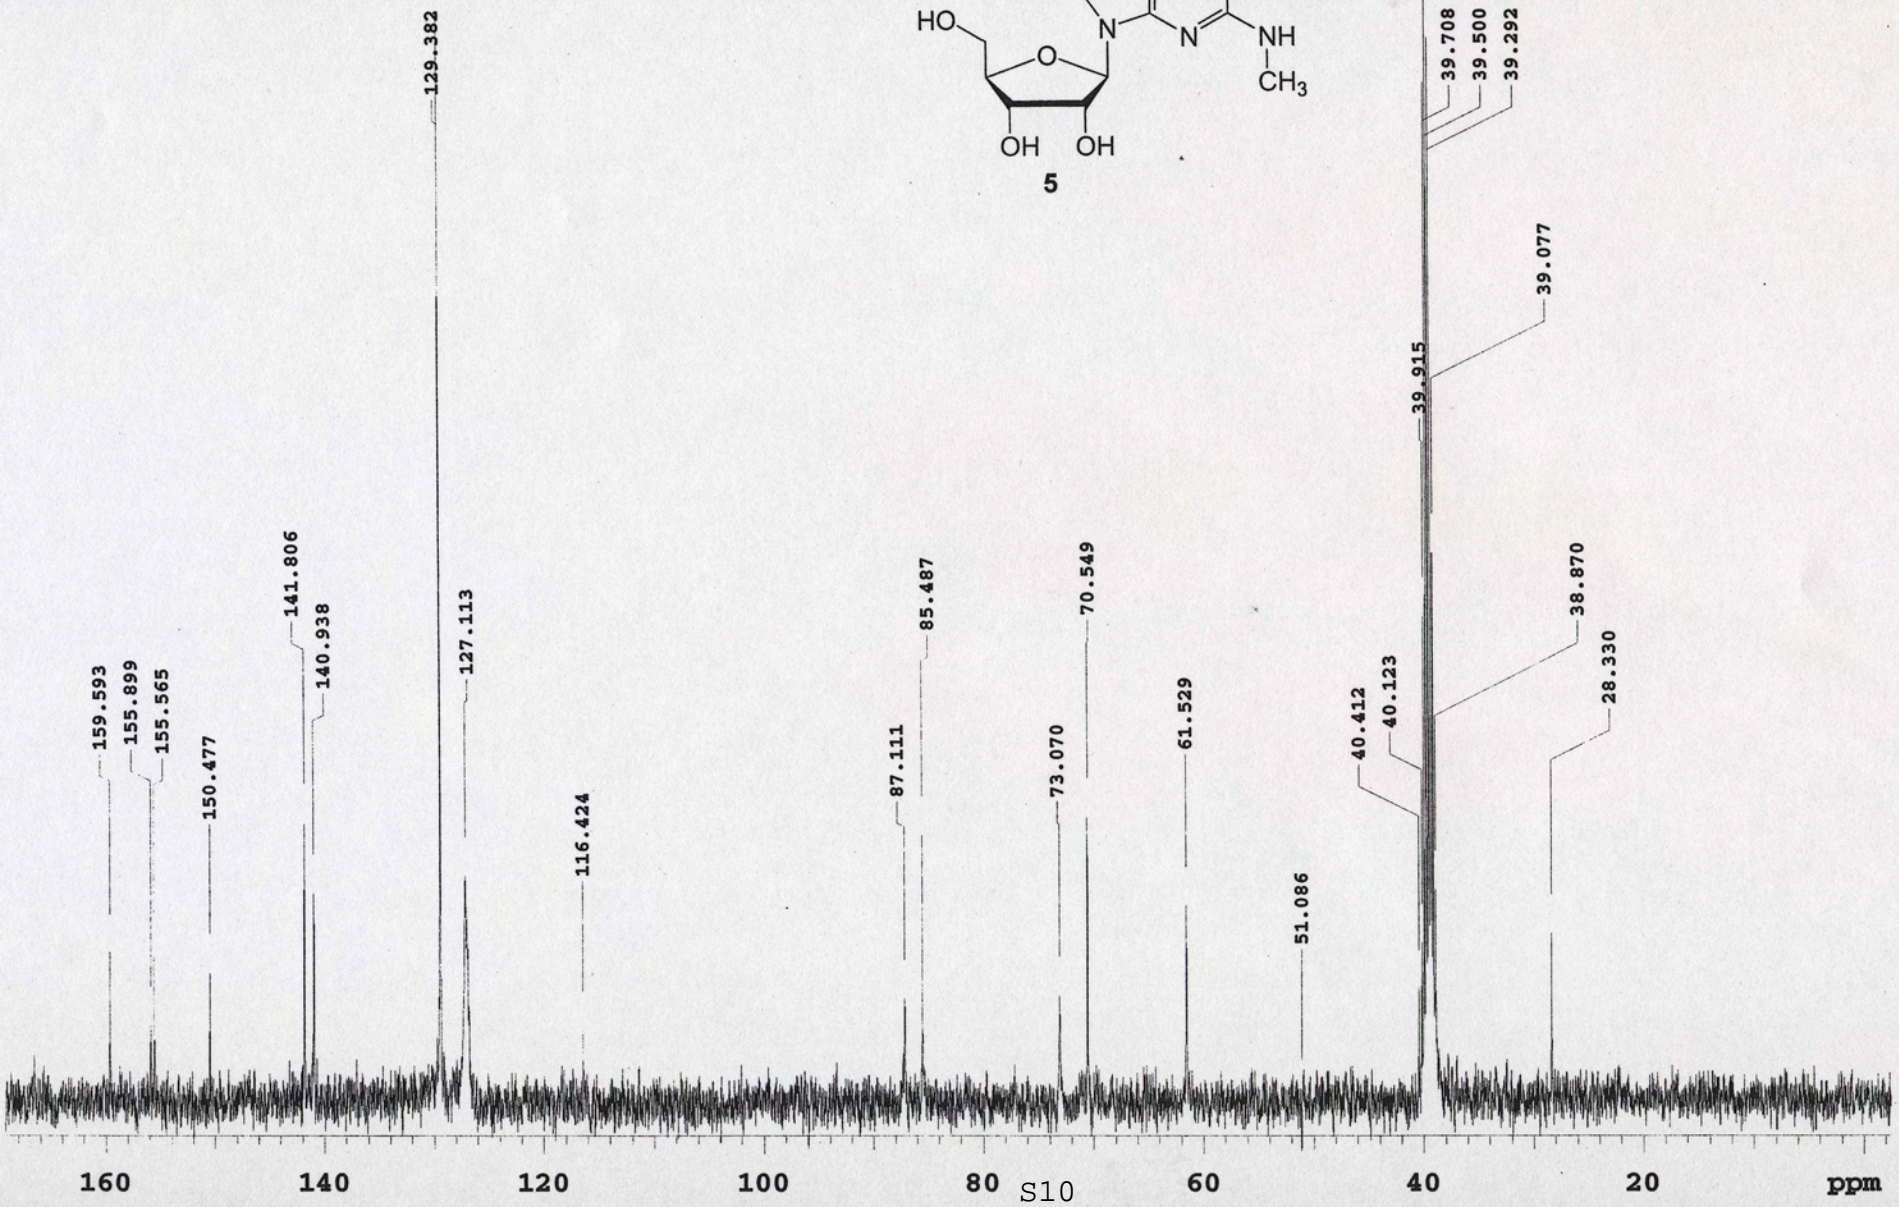

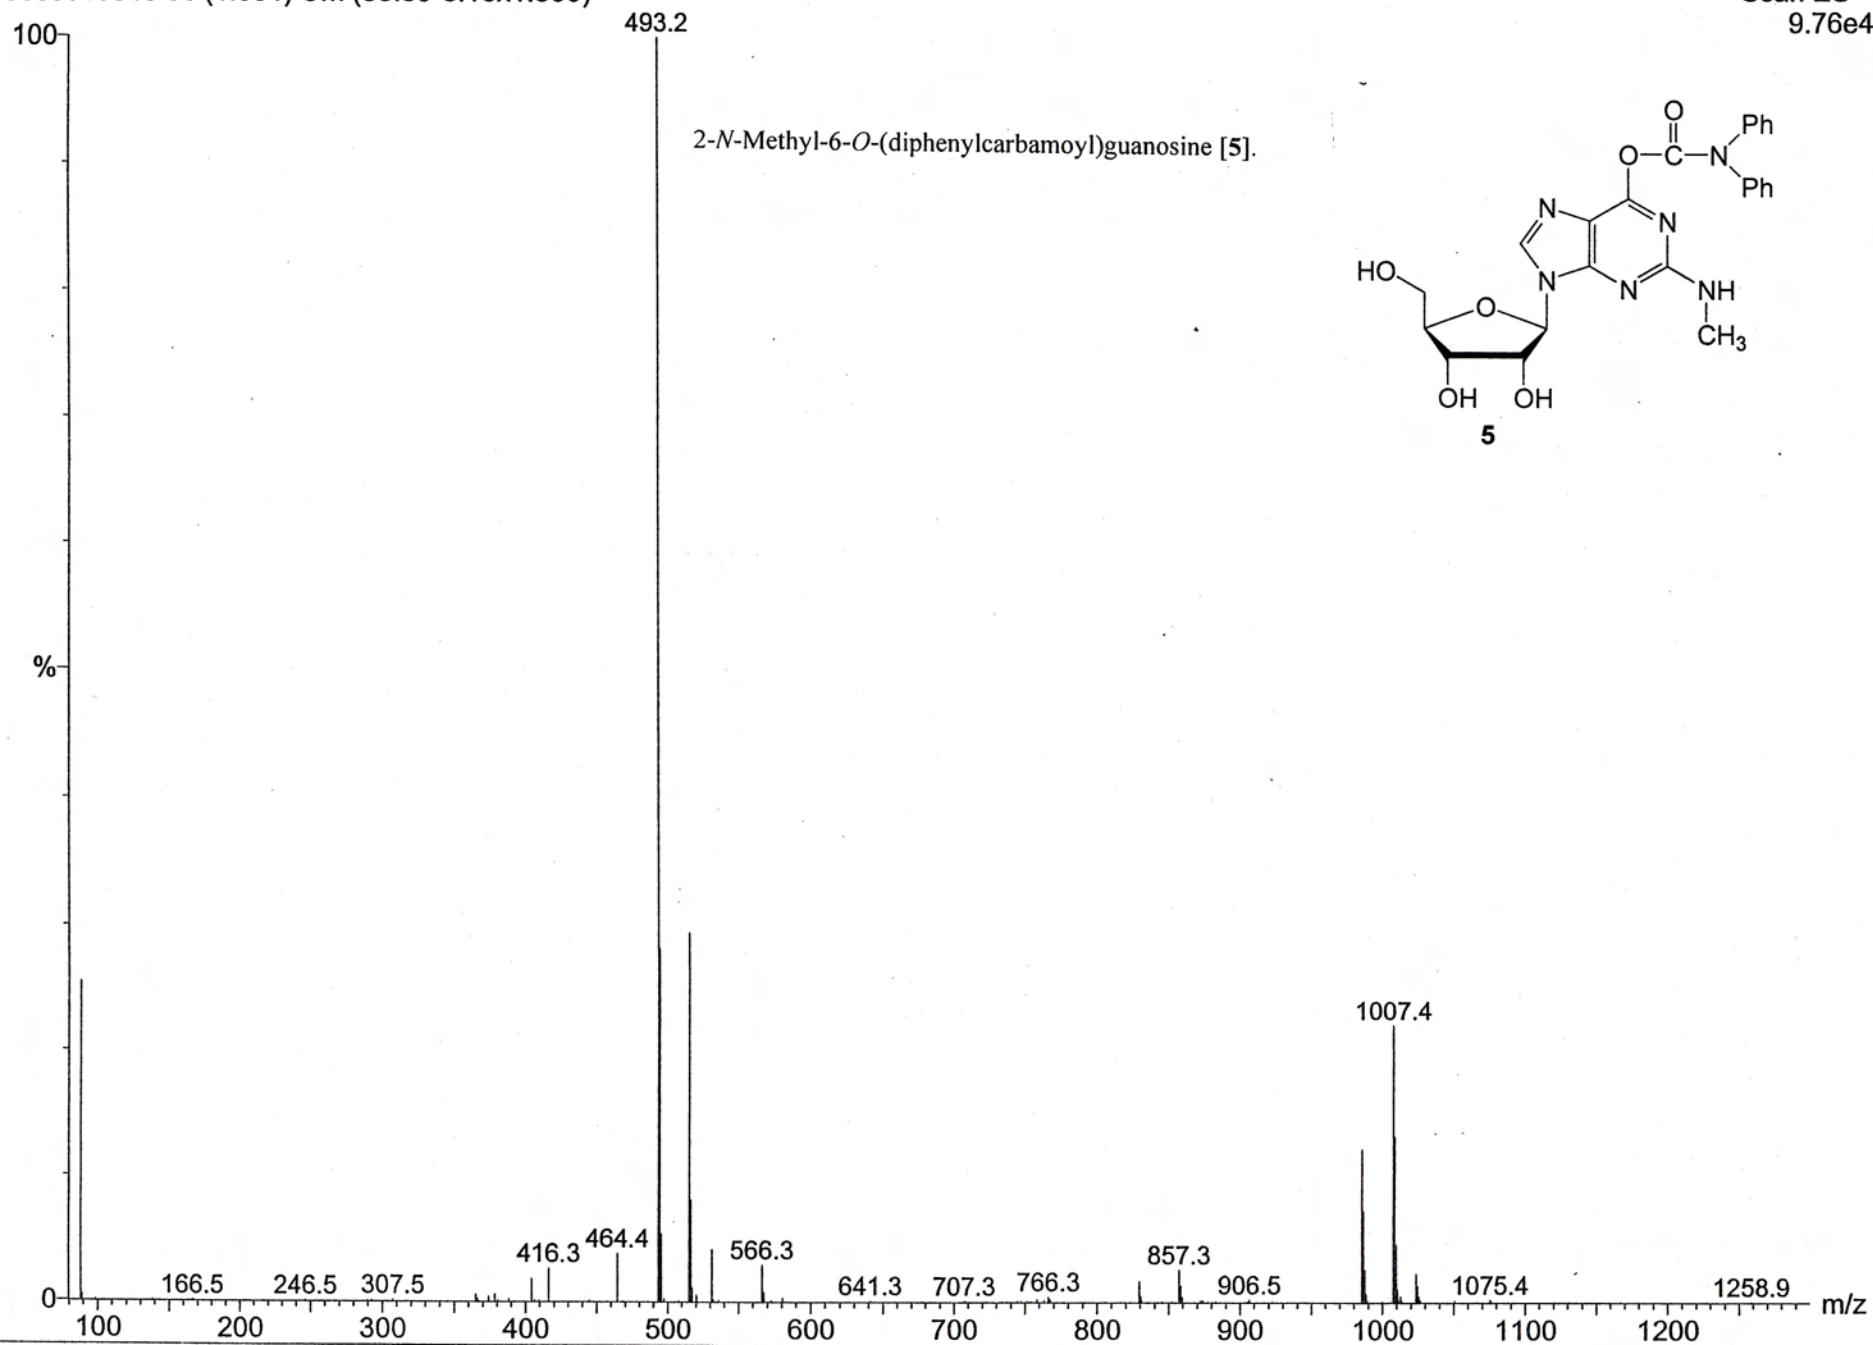



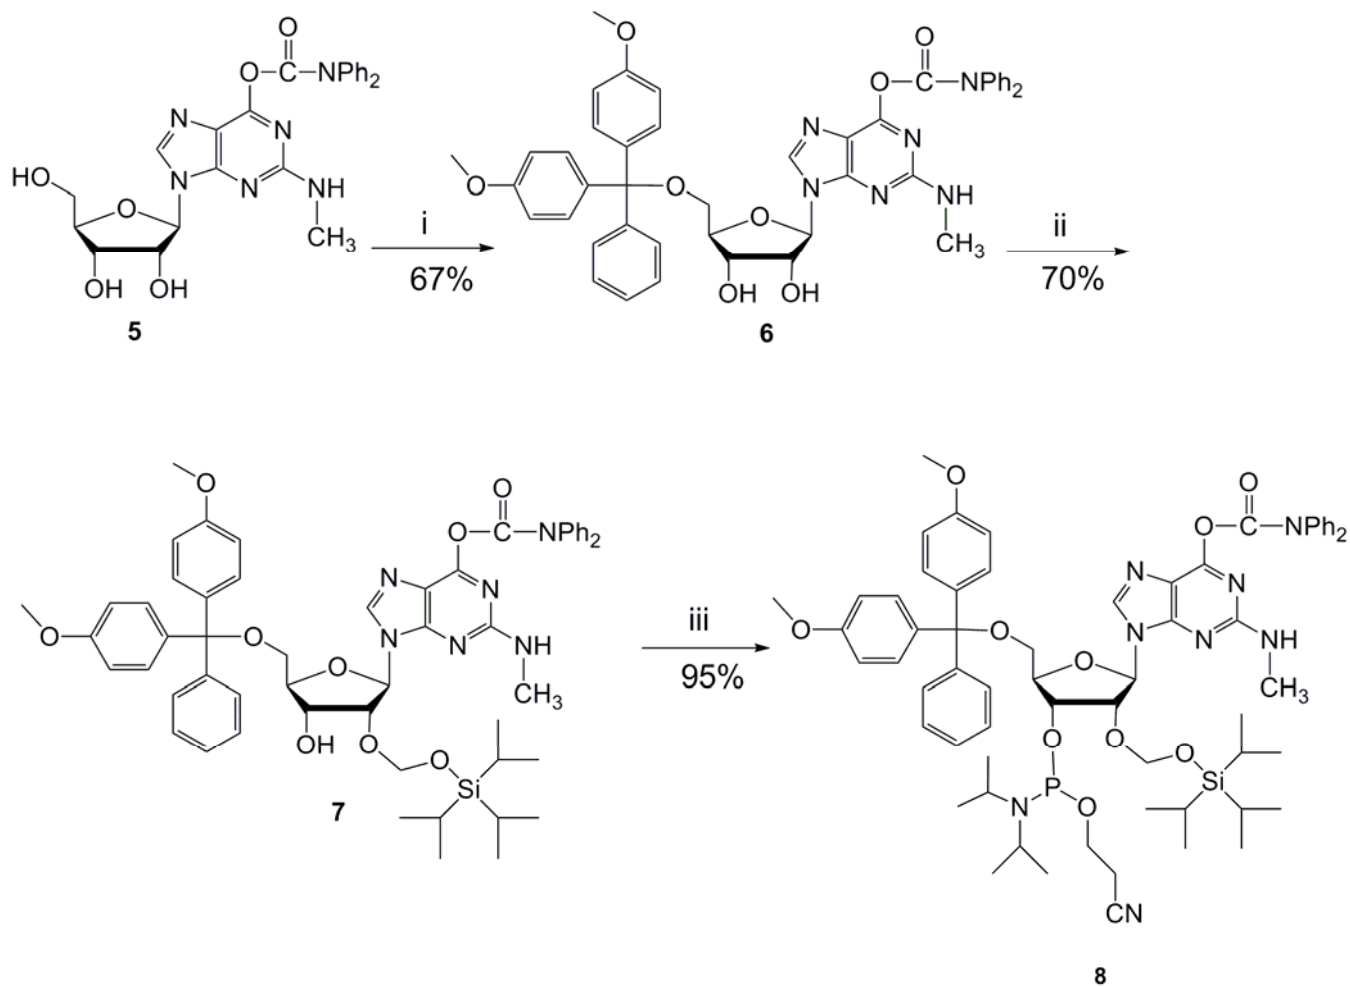

**Supplementary scheme.** Synthesis of 5'-O-DMT-2'-O-TOM-6-O-DPC-2-N-methylguanosine phosphoramidite **8**: (i) DMTCl, DMAP, pyridine, room temperature, 24 h; (ii) a) *tert*-Bu<sub>2</sub>SnCl<sub>2</sub>, *i*Pr<sub>2</sub>NEt, dichloroethane, 70 °C, 15 min; b) TOMCl, room temperature, 3 h; (iii) 2-cyanoethyldiisopropylphosphoramidochloridite, *i*Pr<sub>2</sub>NEt, dichloromethane, room temperature, 2 h.

NMR characterization for 5'-O-(4,4'-Dimethoxytrityl)-2-N-methyl-6-O-(diphenylcarbamoyl)guanosine [6].

$^1\text{H}$  NMR ( $\text{CD}_3\text{OD}$ , 400 MHz) 2.71 (br.s, 1H), 2.98-3.03 (q, 1H), 3.21 (d,  $J = 3.2$  Hz, 3H), 3.25-3.27 (m, 1H), 3.29-3.32 (m, 1H), 3.60 (d,  $J = 4.8$  Hz, 6H), 3.66 (m, 1H), 4.07-4.10 (m, 1H), 4.45 (m, 1H), 4.83 (m, 1H), 5.87 (d,  $J = 4.8$  Hz, 1H), 6.64-6.69 (m, 5H), 7.05-7.38 (m, 18H), 8.0 (s, 1H);  $^{13}\text{C}$  NMR ( $(\text{CD}_3)_2\text{SO}$ , 500 MHz) 28.8, 55.6, 72.2, 74.9, 82.3, 85.3, 87.7, 113.8, 114.0, 126.3, 127.8, 128.5, 128.7, 129.1, 129.2, 129.3, 129.9, 130.2, 130.4, 131.2, 141.2, 149.2, 159.9

5'-O-(4,4'-Dimethoxytrityl)-2-N-methyl-6-O-(diphenylcarbamoyl)guanosine [6]

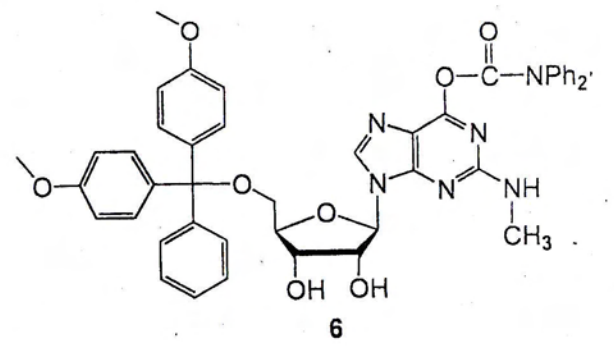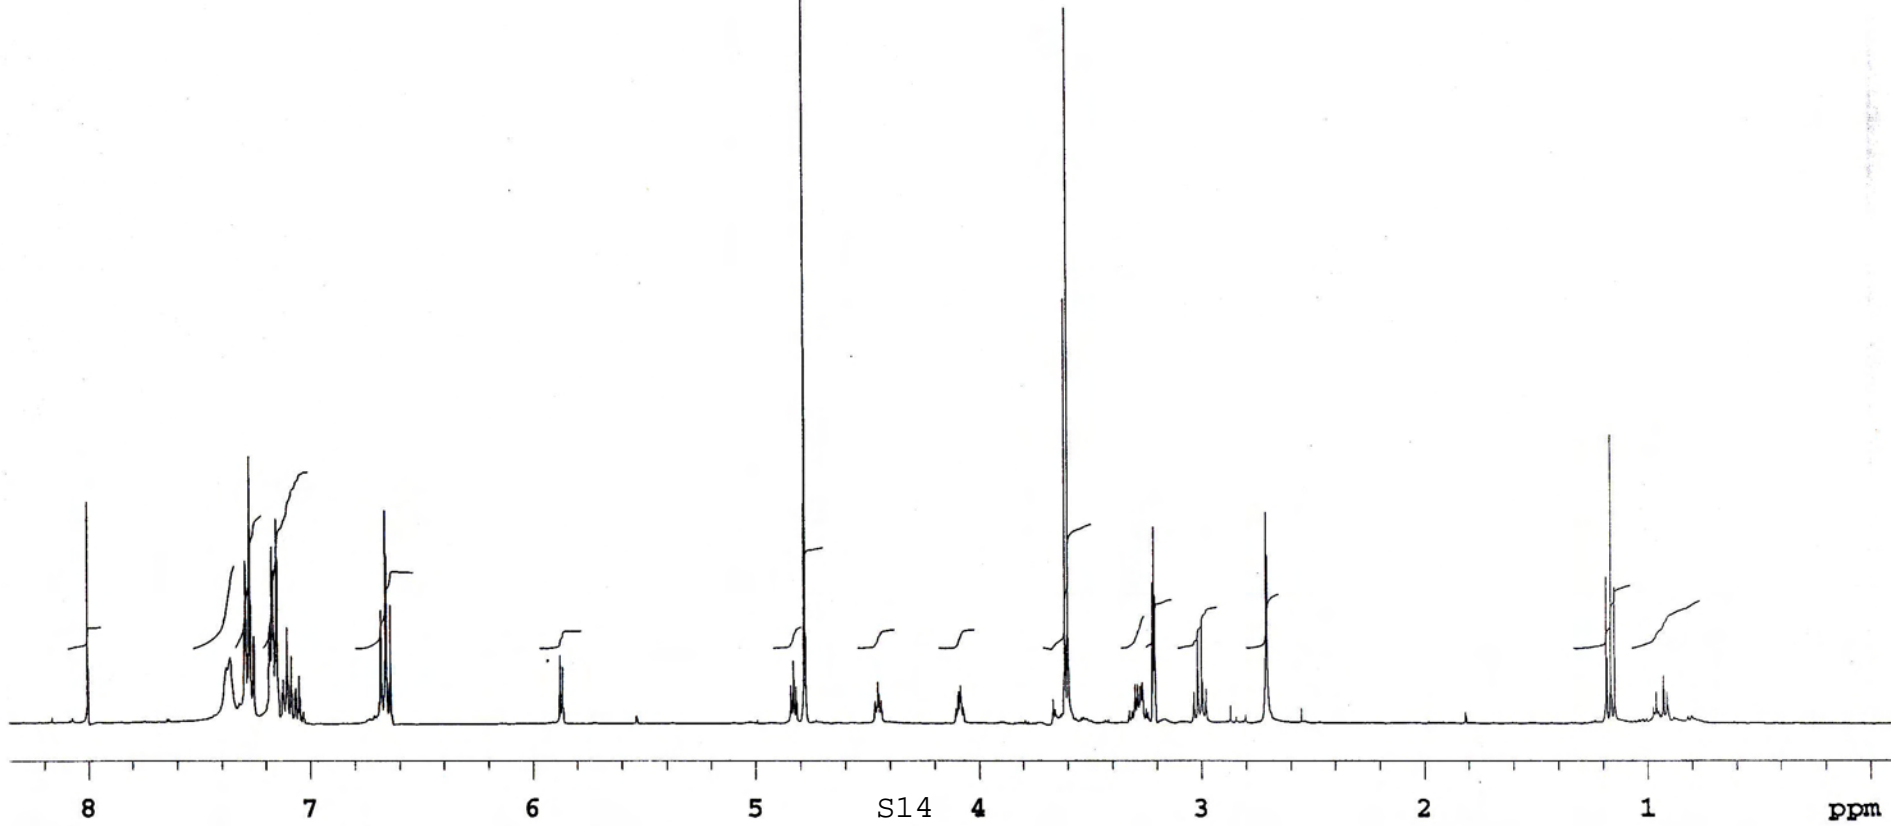

5'-O-(4,4'-Dimethoxytrityl)-2-N-methyl-6-O-(diphenylcarbamoyl)guanosine [6]

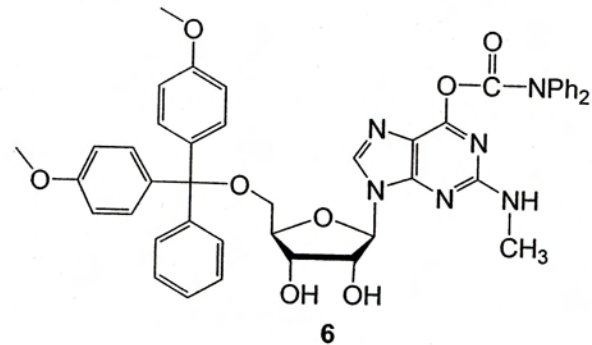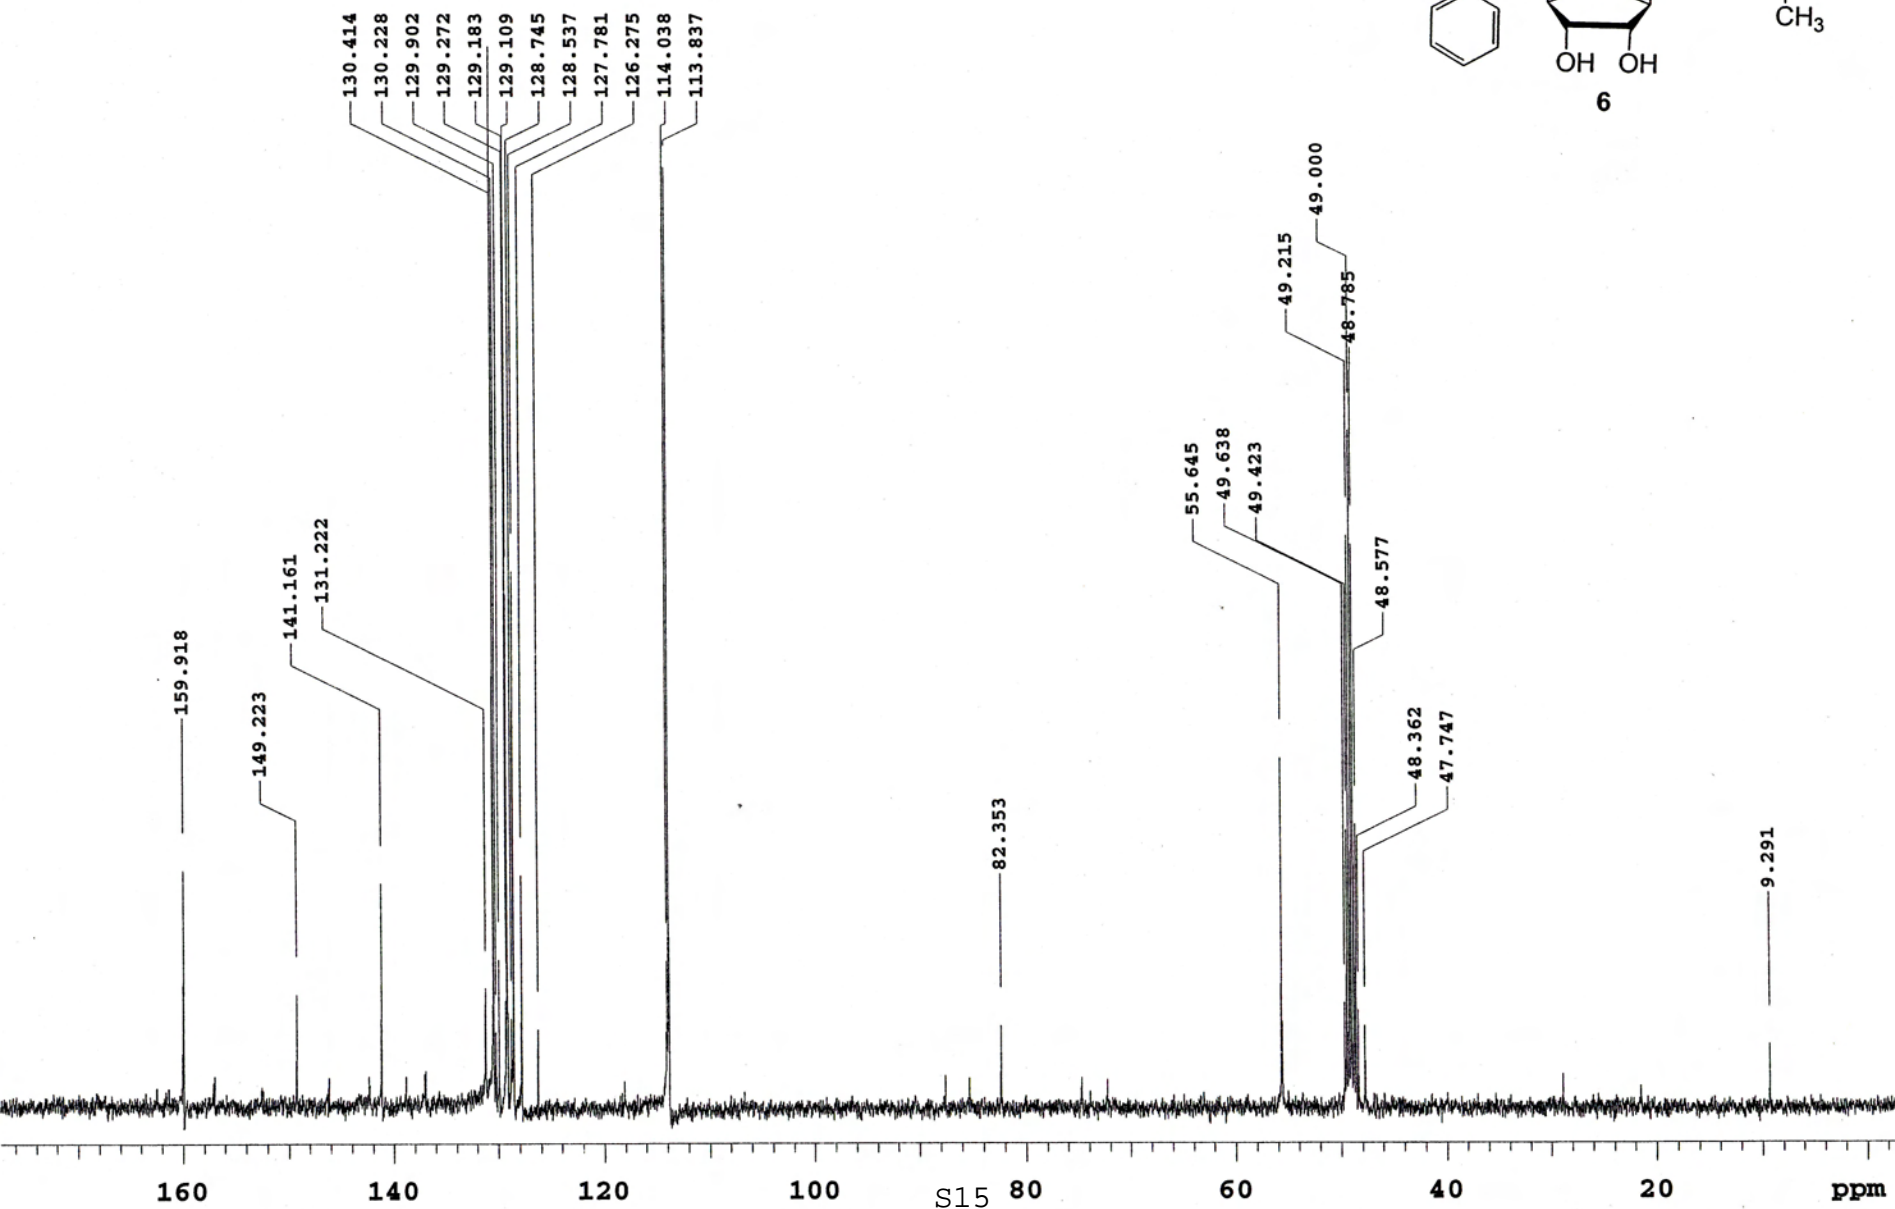

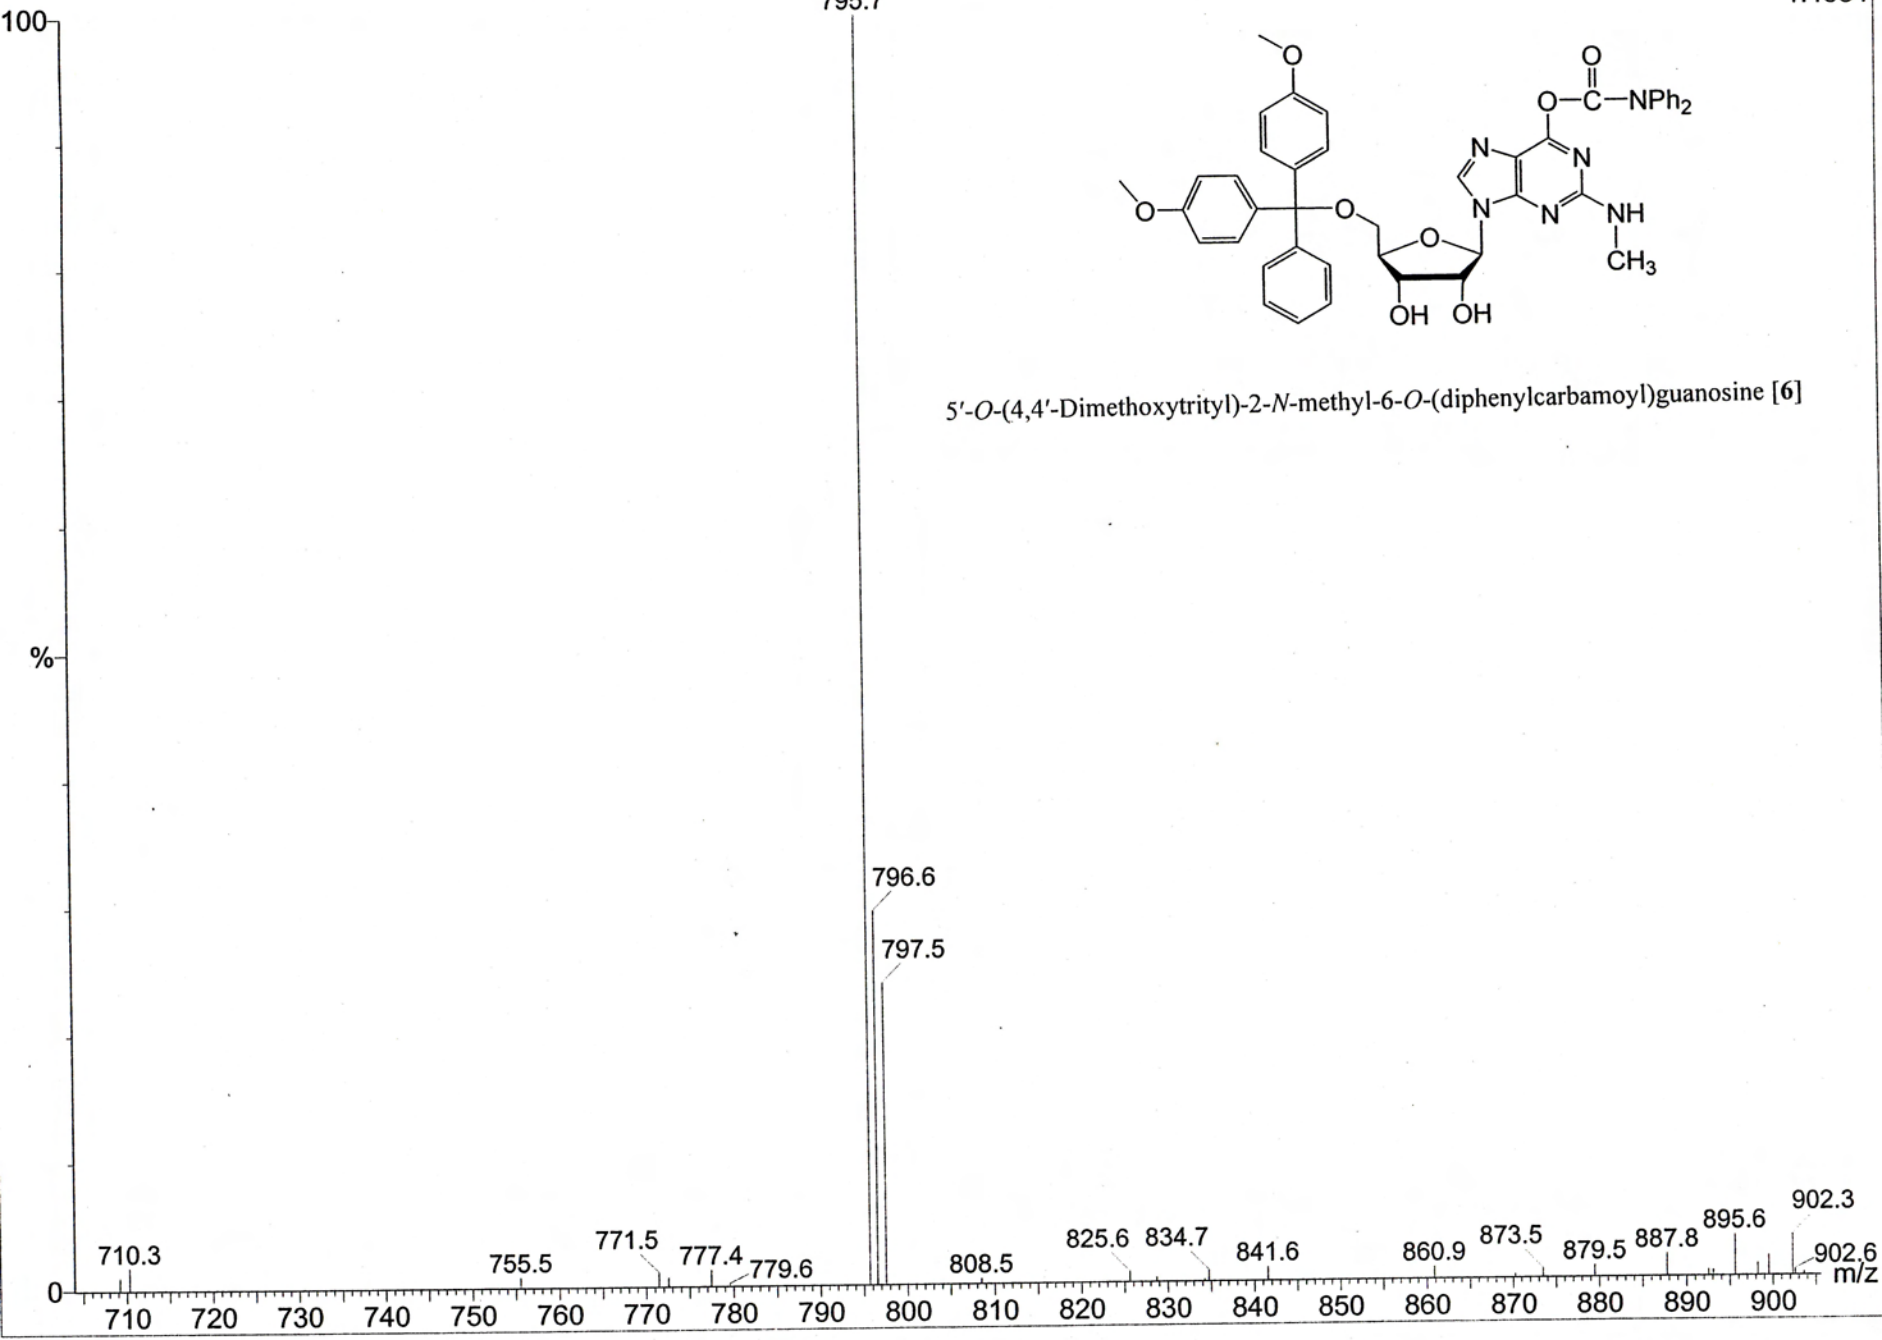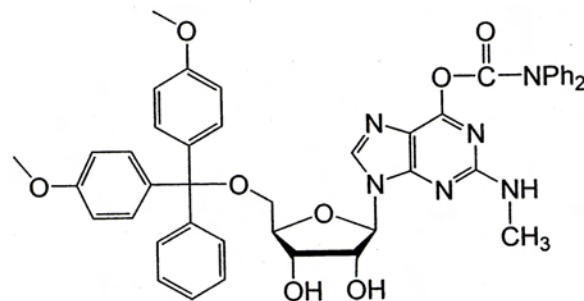

5'-O-(4,4'-Dimethoxytrityl)-2-N-methyl-6-O-(diphenylcarbamoyl)guanosine [6]



NMR characterization for 5'-O-(4,4'-Dimethoxytrityl)-2'-O-[[triisopropylsilyl]oxy]methyl]-2-N-methyl-6-O-(diphenylcarbamoyl)guanosine [7].

<sup>1</sup>H NMR (CD<sub>3</sub>OD, 400 MHz) 0.89-1.05 (m, 18H), 1.25-1.3 (m, 3H), 2.79-2.8 (m, 7H), 3.1 (s, 1H), 3.3-3.5 (m, 2H), 3.70 (d, *J* = 4.8 Hz, 3H), 4.15-4.25 (m, 1H), 4.65-4.7 (m, 1H), 4.85 (s, 2H), 5.05-5.15 (m, 1H), 6.1 (d, *J* = 5 Hz, 1H), 6.79-6.83 (m, 5H), 7.17-7.5 (m, 18H), 8.05 (s, 1H)

proton spectrum

5'-O-(4,4'-Dimethoxytrityl)-2'-O-[[[(triisopropylsilyl)oxy]methyl]-2-N-methyl-6-O-(diphenylcarbamoyl) guanosine [7].

Pulse Sequence: s2pul

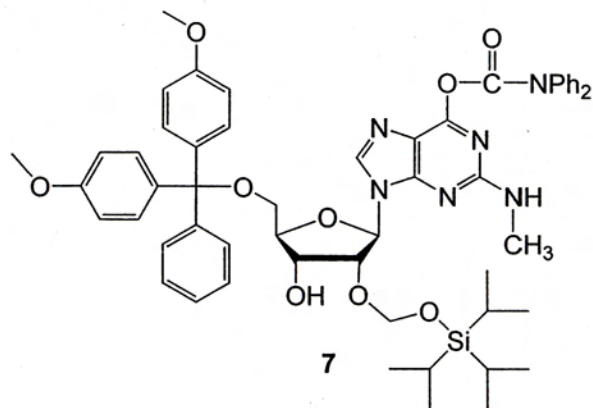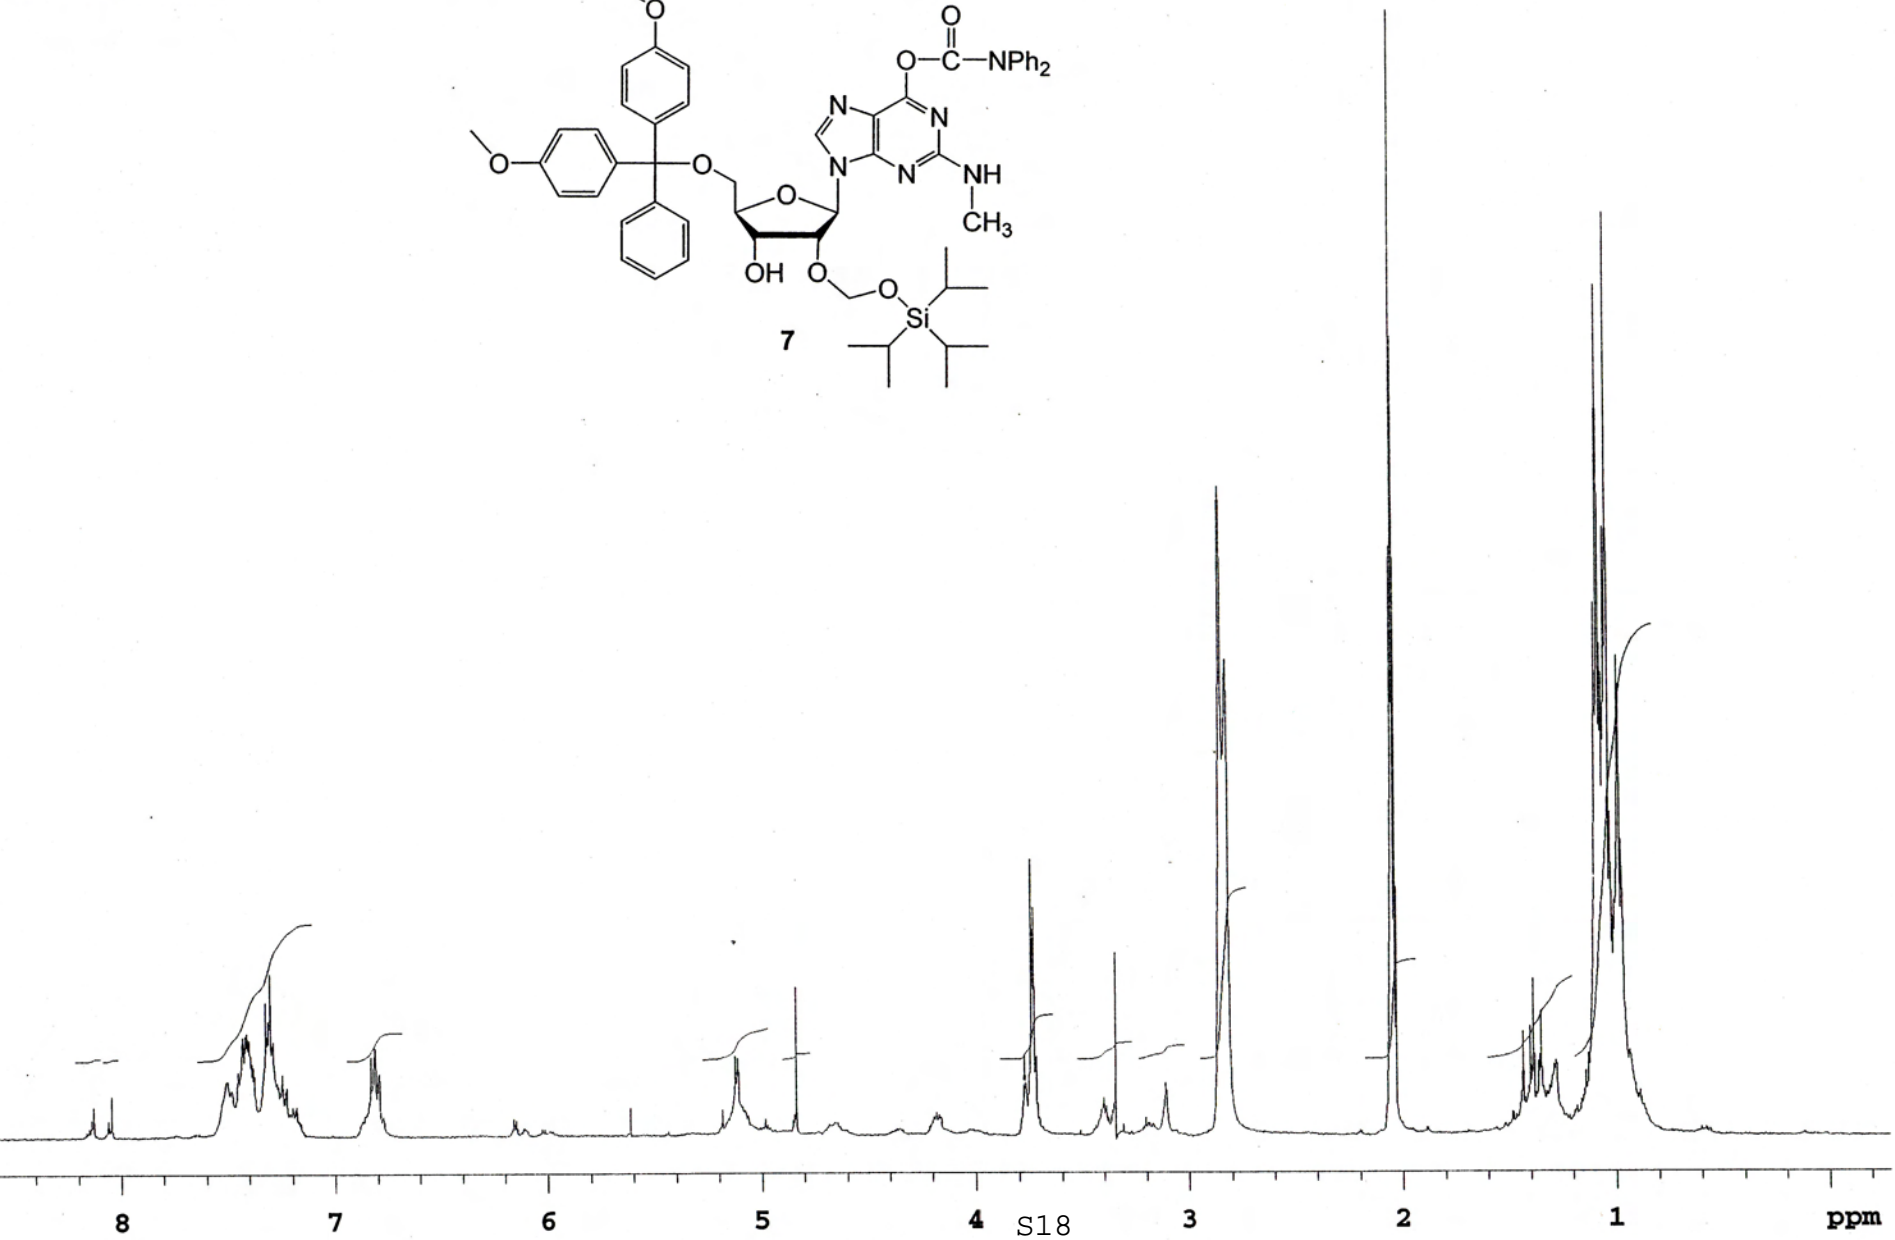

5'-O-(4,4'-Dimethoxytrityl)-2'-O-[[[(triisopropylsilyl)oxy]methyl]-2-N-methyl-6-O-(diphenylcarbamoyl) guanosine [7].

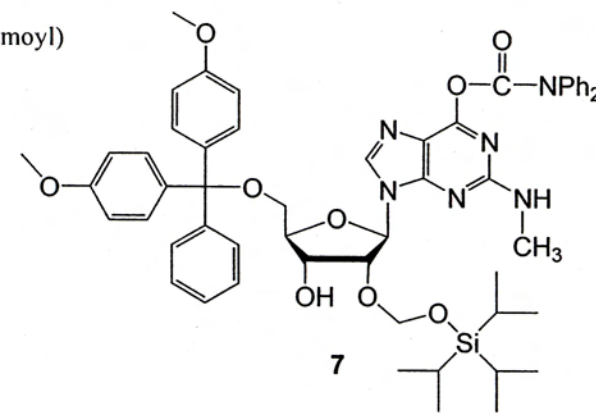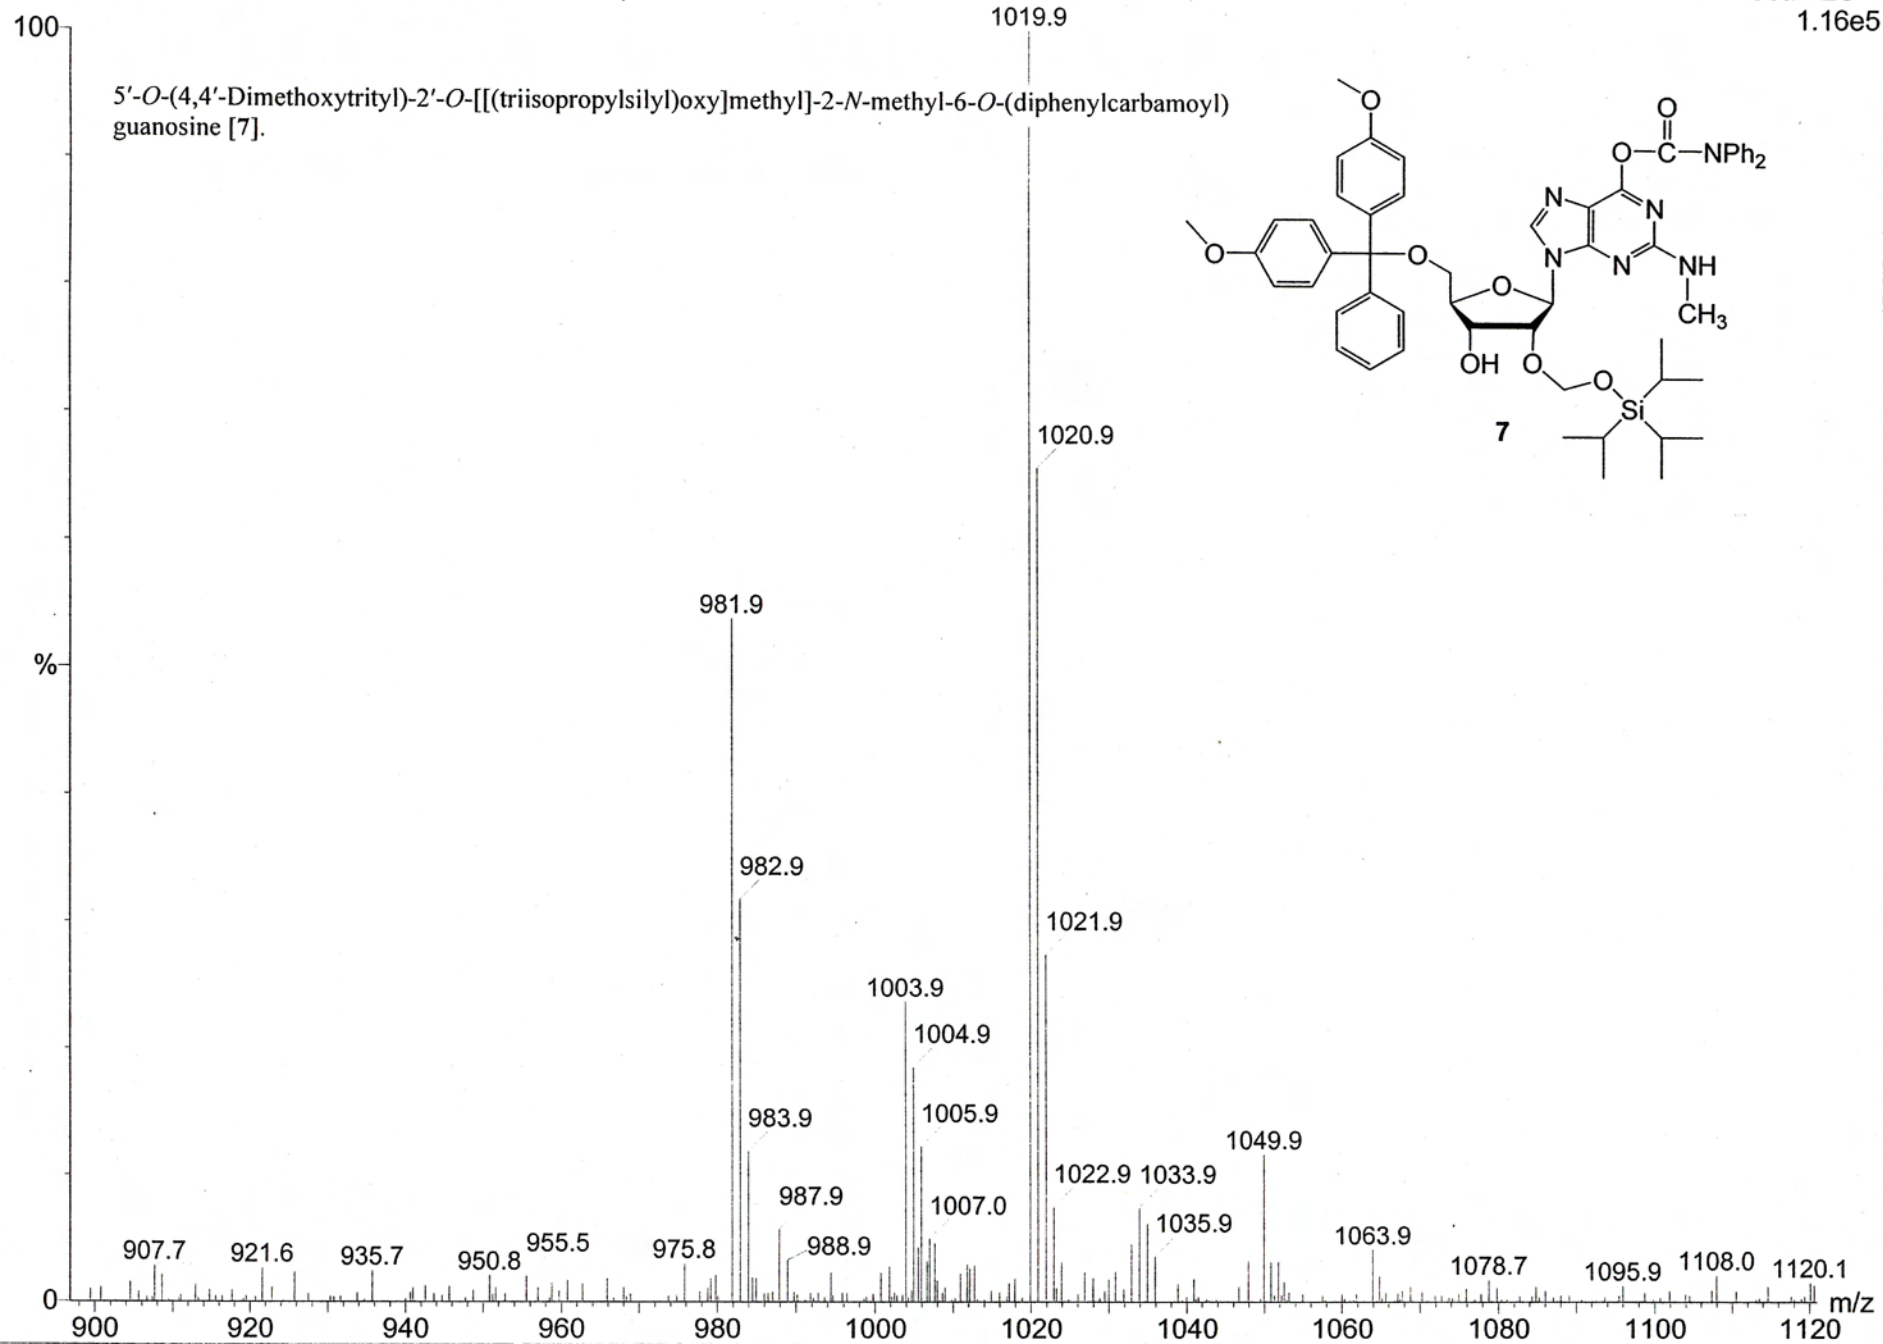



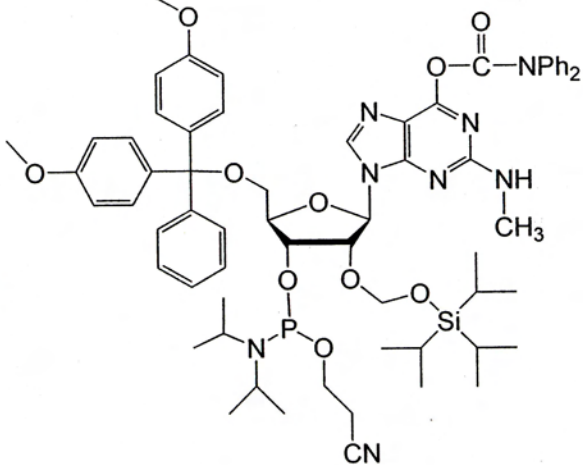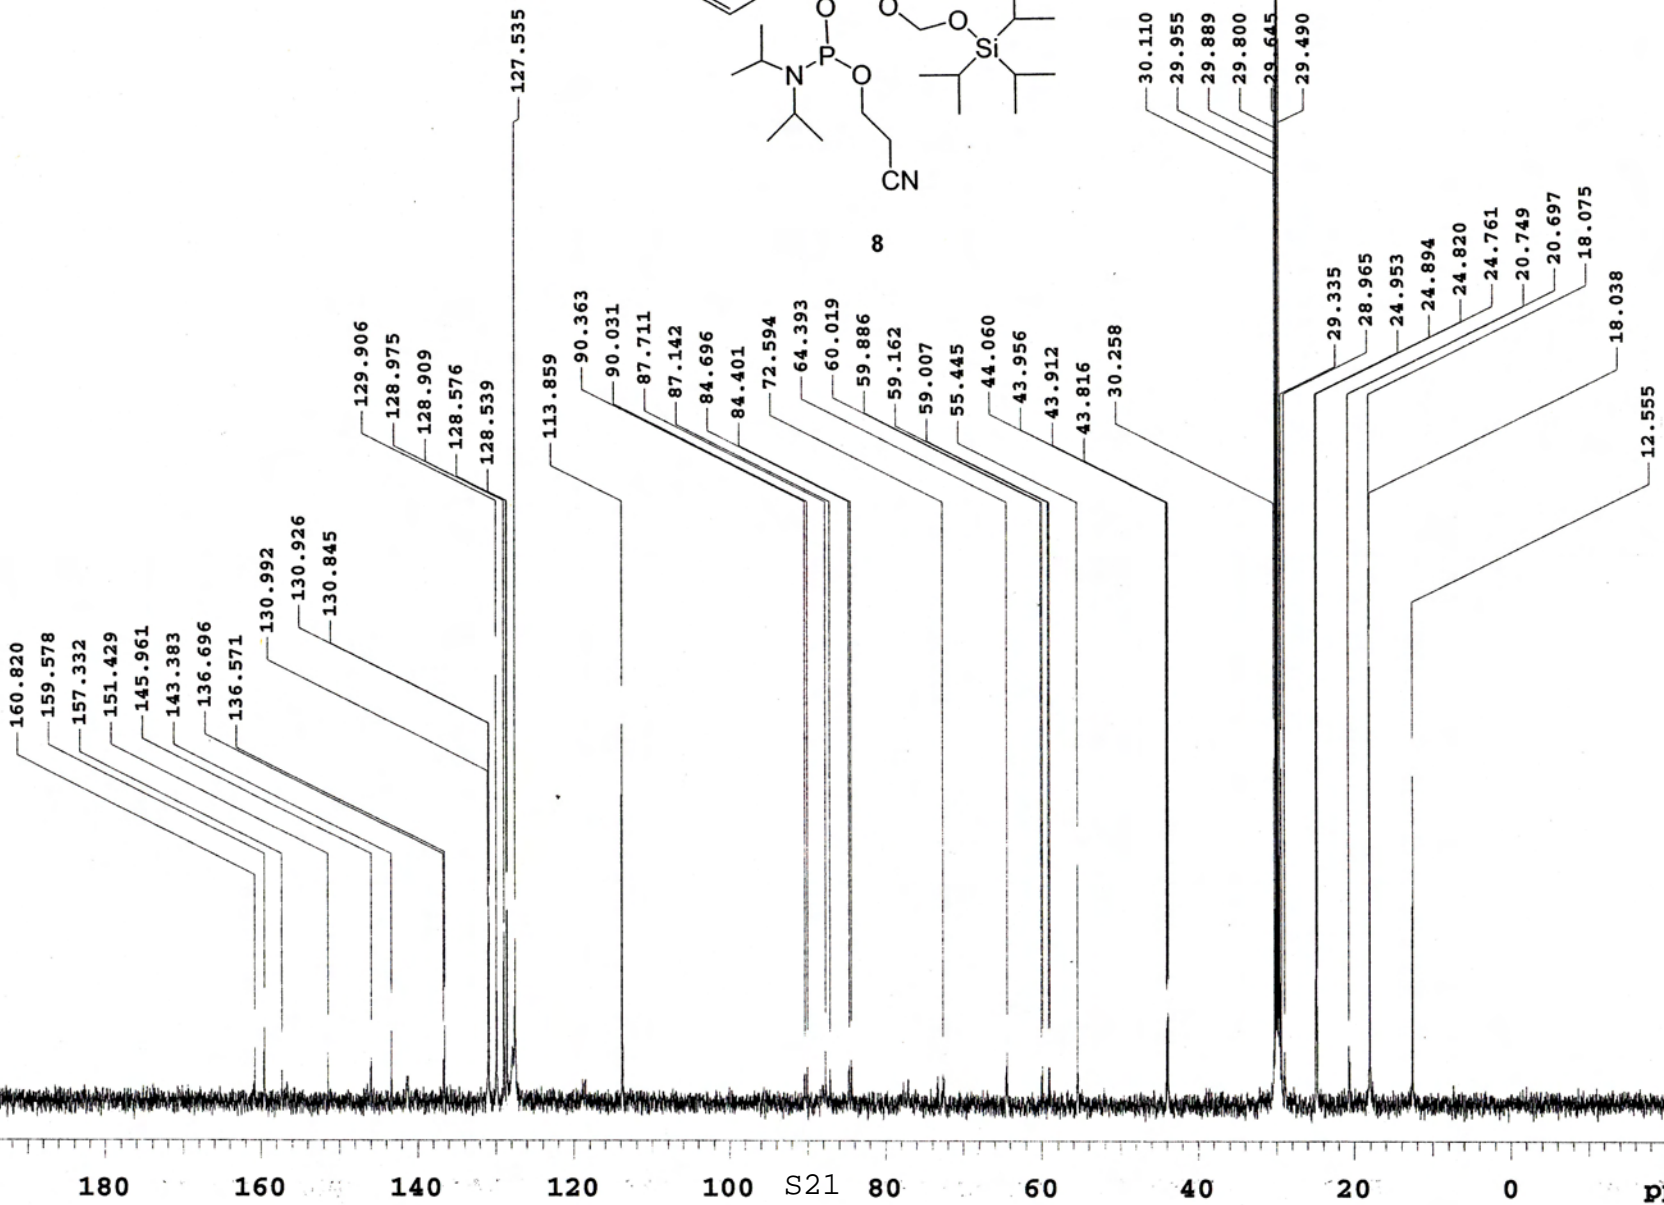

5'-O-(4,4'-Dimethoxytrityl)-2'-O-[[[triisopropylsilyloxy]methyl]-2-N-methyl-6-O-(diphenylcarbamoyl) guanosine 3'-(2-cyanoethyl) diisopropylphosphoramidite] [8].

Pulse Sequence: s2pul

5'-O-(4,4'-Dimethoxytrityl)-2'-O-[[[(triisopropylsilyl)oxy]methyl]-2-N-methyl-6-O-(diphenylcarbamoyl) guanosine 3'-(2-cyanoethyl diisopropylphosphoramidite) [8].

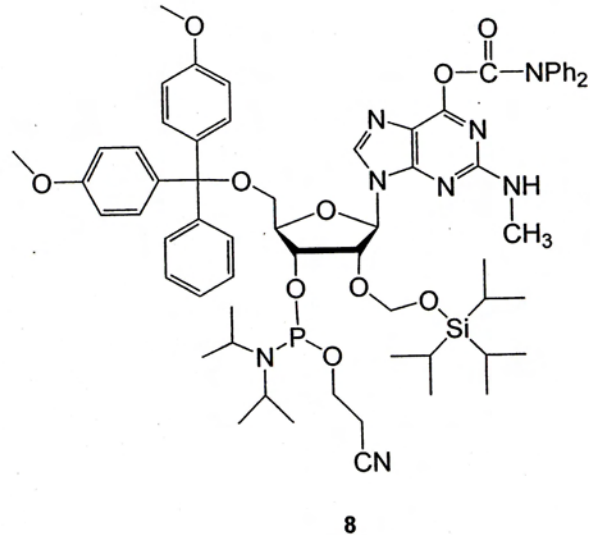

151.138  
150.955

155 150 145 140 135 130 S22 125 120 115 110 105 ppm

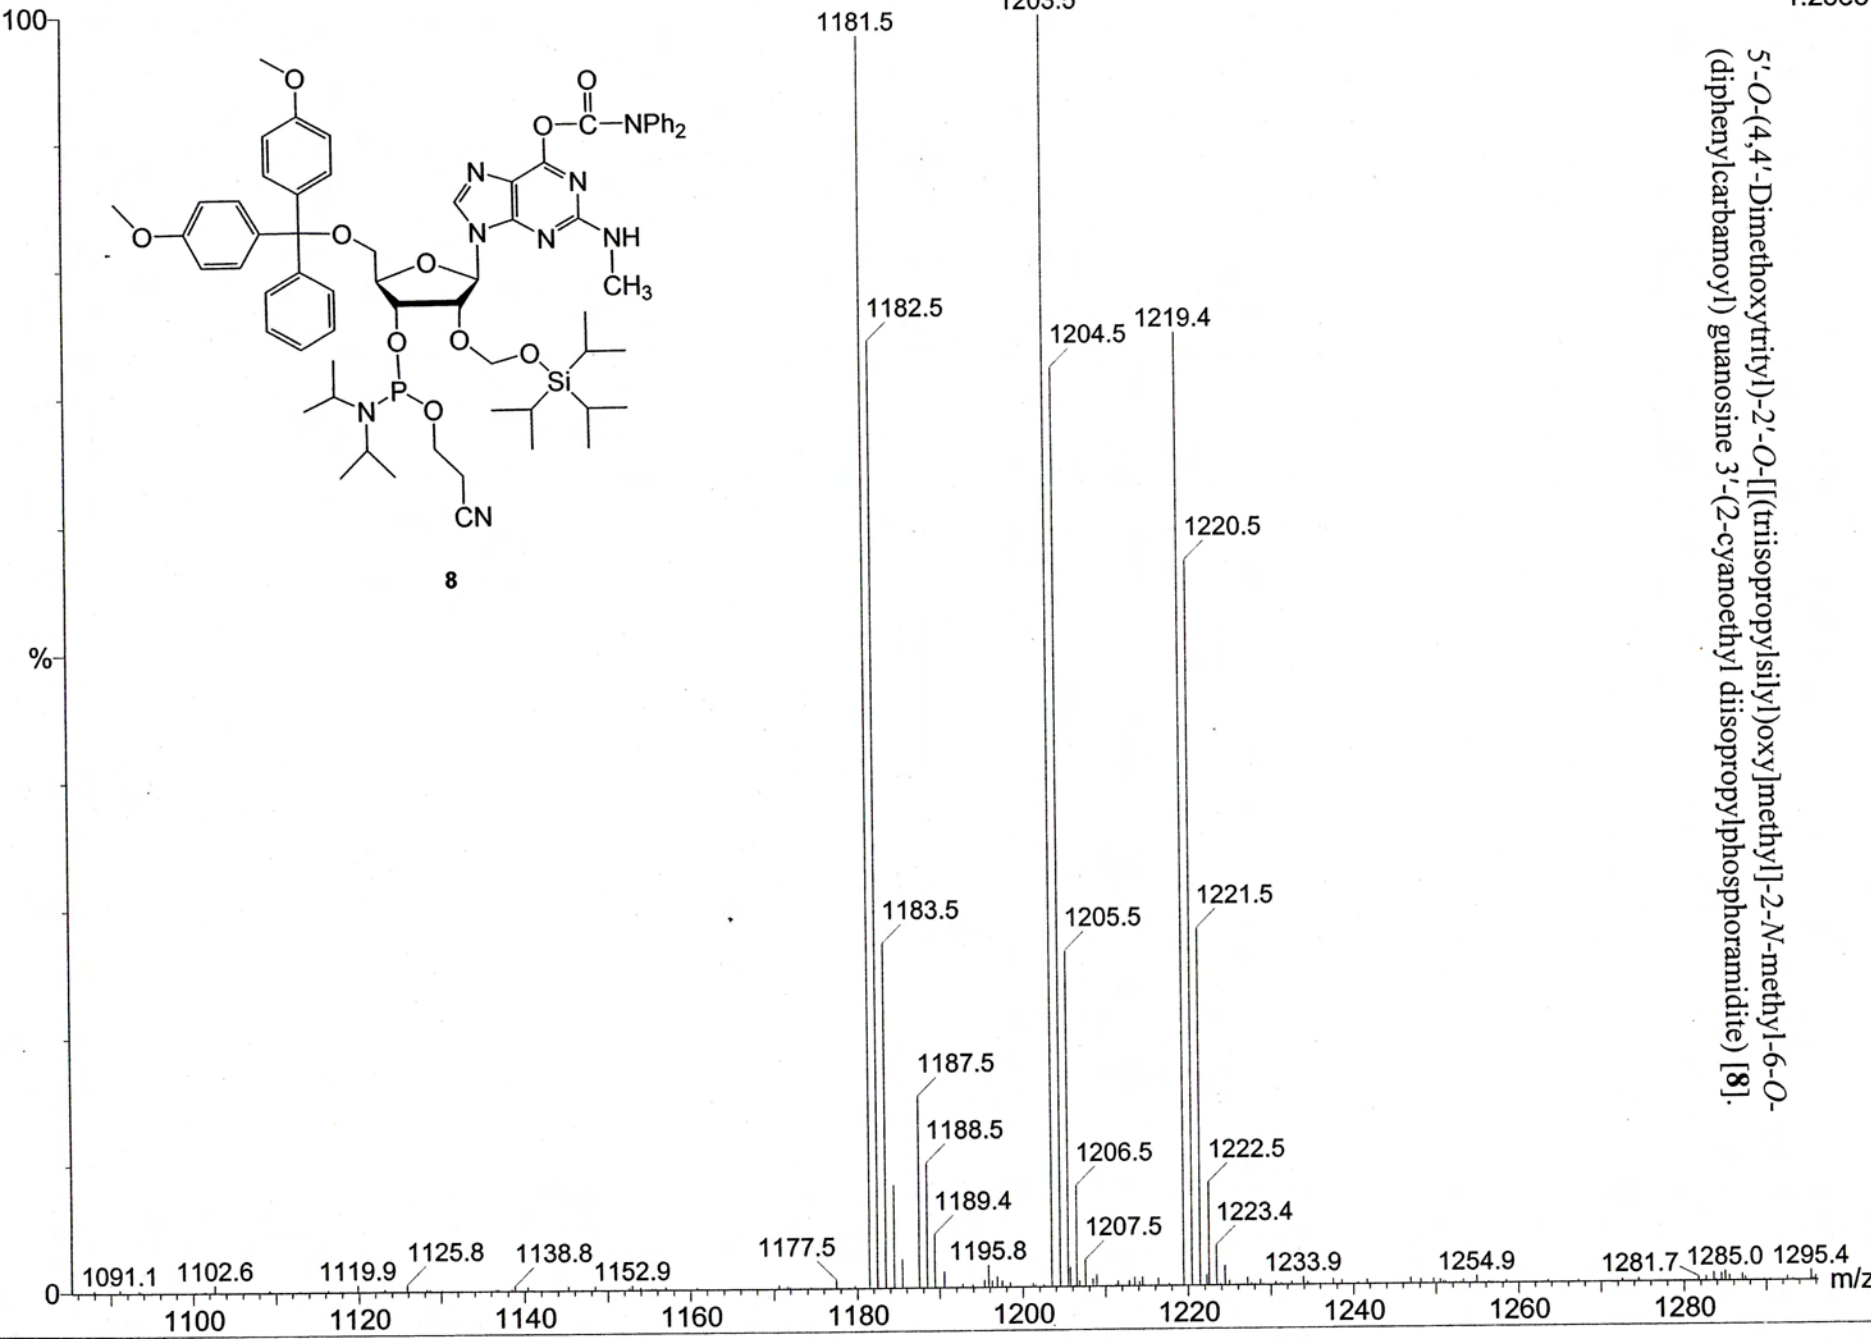

5'-O-(4,4'-Dimethoxytrityl)-2'-O-[[[triisopropylsilyl]oxy]methyl]-2-N-methyl-6-O-(diphenylcarbamoyl) guanosine 3'-(2-cyanoethyl diisopropylphosphoramidite) [8].



# Elemental Composition Report

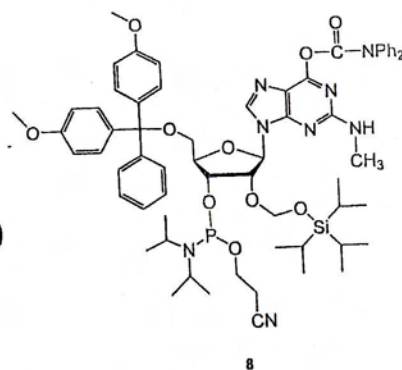

5'-O-(4,4'-Dimethoxytrityl)-2'-O-[[[(triisopropylsilyl)oxy]methyl]-2-N-methyl-6-O-(diphenylcarbamoyl) guanosine 3'-(2-cyanoethyl diisopropylphosphoramidite) [8].

## Single Mass Analysis

Tolerance = 8.0 PPM / DBE: min = -1.5, max = 50.0

Element prediction: Off

Number of isotope peaks used for i-FIT = 3

Monoisotopic Mass, Even Electron Ions

1096 formula(e) evaluated with 3 results within limits (up to 50 best isotopic matches for each mass)

Elements Used:

C: 0-66 H: 0-1000 N: 0-8 O: 0-10 <sup>23</sup>Na: 0-1 Si: 0-1 P: 0-1

Chow- Dinuka Abeydeera DA-i-244 LCT0246 mw1180 4uL meoh

Shay 2008-07b.pro

2008\_1212\_0246b 14 (0.301) Cm (11:20-(1:6+26:36)x3.000)

LCT Premier 12-Dec-2008 14:48:58

1: TOF MS ES+

4.25e+004

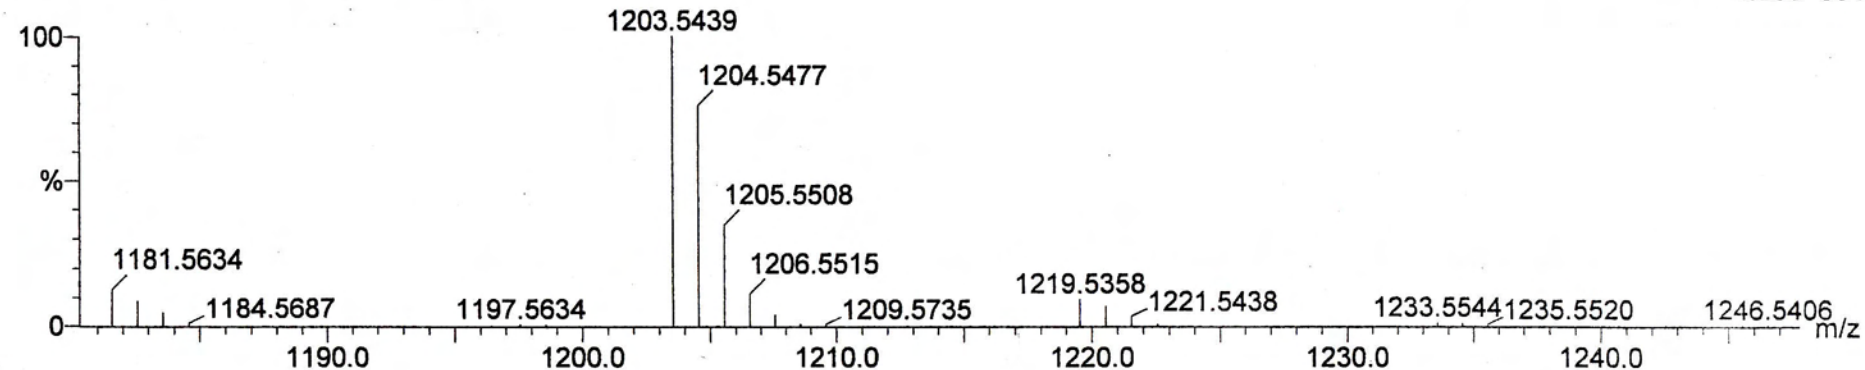

Minimum: -1.5

Maximum: 5.0 8.0 50.0

| Mass      | Calc. Mass | mDa  | PPM  | DBE  | i-FIT | i-FIT (Norm) | Formula               |
|-----------|------------|------|------|------|-------|--------------|-----------------------|
| 1181.5634 | 1181.5637  | -0.3 | -0.3 | 26.5 | 25.0  | 0.5          | C62 H83 N8 O10        |
|           |            |      |      |      |       |              | <sup>23</sup> Na Si P |
|           | 1181.5661  | -2.7 | -2.3 | 29.5 | 25.7  | 1.2          | C64 H82 N8 O10 Si     |
|           |            |      |      |      |       |              | P                     |
|           | 1181.5605  | 2.9  | 2.5  | 31.5 | 26.6  | 2.2          | C66 H79 N8 O9         |
|           |            |      |      |      |       |              | <sup>23</sup> Na P    |
